# Supplementary material for: Tropinone-Derived Alkaloids as Potent Anticancer Agents: Synthesis, Tyrosinase Inhibition, Mechanism of Action, DFT Calculation, and Molecular Docking Studies
Source: PubMed Central journal article supplement (PMC7731314; doi:10.3390/ijms21239050), 2020-11-28
Supplement: ijms-21-09050-s001.pdf [file ijms-21-09050-s001.pdf]

## Supplementary material

1. Table S1. Pearson's correlation matrix for descriptors collected in Table 1 and the experimental  $\text{pIC}_{50} = -\log(\text{IC}_{50})$  values.
2. Table S2-S3. Effect of compound **3a** on cell cycle distribution in the RPMI 8226 and A549 cell lines cultures.
3. Table S4-S5. Effects of compound **3a** on apoptosis (early + late apoptosis) induction in the RPMI 8226 and A549 cells.
4.  $^1\text{H}$ ,  $^{13}\text{C}$  NMR and LC-ESI-HRMS spectra of compounds **3a-3h**.
5. Molecular orbital distribution plots of HOMO-LUMO for compound **3a-3h** at B3LYP/6-311G\*\* level
6. Geometrical parameters of the investigated compounds **3a-3h** at B3LYP/6-311G\*\* level.
7. Scheme S1. Structure of isomers 1 and 2 of investigated compounds.
8. Table S6. Fractional populations [%] of isomers 1 and 2 of investigated compounds.

**Table S1.** Pearson's correlation matrix for descriptors collected in Table 1 and the experimental  $pIC_{50} = -\log(IC_{50})$  values.

|                   | logP   | HBA    | HBD    | MW     | NRB    | TPSA   | E <sub>HOMO</sub> | E <sub>LUMO</sub> | ΔE     | η      | S      | IP     | EA     | χ      | pIC <sub>50</sub> |
|-------------------|--------|--------|--------|--------|--------|--------|-------------------|-------------------|--------|--------|--------|--------|--------|--------|-------------------|
| logP              | 1.000  |        |        |        |        |        |                   |                   |        |        |        |        |        |        |                   |
| HBA               | -0.450 | 1.000  |        |        |        |        |                   |                   |        |        |        |        |        |        |                   |
| HBD               | -0.666 | -0.124 | 1.000  |        |        |        |                   |                   |        |        |        |        |        |        |                   |
| MW                | 0.355  | 0.036  | -0.052 | 1.000  |        |        |                   |                   |        |        |        |        |        |        |                   |
| NRB               | -0.615 | 0.435  | 0.545  | 0.133  | 1.000  |        |                   |                   |        |        |        |        |        |        |                   |
| TPSA              | -0.864 | 0.749  | 0.432  | -0.094 | 0.532  | 1.000  |                   |                   |        |        |        |        |        |        |                   |
| E <sub>HOMO</sub> | -0.128 | -0.536 | 0.571  | -0.264 | 0.078  | -0.295 | 1.000             |                   |        |        |        |        |        |        |                   |
| E <sub>LUMO</sub> | 0.019  | -0.648 | 0.575  | -0.016 | 0.194  | -0.397 | 0.872             | 1.000             |        |        |        |        |        |        |                   |
| ΔE                | 0.129  | -0.623 | 0.480  | 0.177  | 0.249  | -0.408 | 0.626             | 0.928             | 1.000  |        |        |        |        |        |                   |
| η                 | 0.128  | -0.623 | 0.481  | 0.176  | 0.249  | -0.408 | 0.627             | 0.928             | 1.000  | 1.000  |        |        |        |        |                   |
| S                 | -0.138 | 0.629  | -0.479 | -0.156 | -0.228 | 0.412  | -0.622            | -0.925            | -0.999 | -0.999 | 1.000  |        |        |        |                   |
| IP                | 0.128  | 0.536  | -0.571 | 0.264  | -0.078 | 0.295  | -1.000            | -0.872            | -0.626 | -0.627 | 0.622  | 1.000  |        |        |                   |
| EA                | -0.019 | 0.648  | -0.575 | 0.016  | -0.194 | 0.397  | -0.872            | -1.000            | -0.928 | -0.928 | 0.925  | 0.872  | 1.000  |        |                   |
| χ                 | 0.030  | 0.630  | -0.591 | 0.100  | -0.161 | 0.375  | -0.940            | -0.987            | -0.854 | -0.855 | 0.851  | 0.940  | 0.987  | 1.000  |                   |
| pIC <sub>50</sub> | -0.472 | -0.459 | 0.694  | -0.282 | 0.260  | 0.134  | 0.410             | 0.384             | 0.298  | 0.299  | -0.295 | -0.410 | -0.384 | -0.404 | 1.000             |

**Table S2.** Effect of compound **3a** on cell cycle distribution in the RPMI 8226 cell line culture. After the treatment with various concentrations of compound 1 for 24 and 48 h, the cells were stained with propidium iodide and analyzed by flow cytometry. \* $p < 0.05$ , \*\* $p < 0.01$ , and  $p < 0.001$ \*\*\* in comparison to the control; one-way ANOVA test

| Concentration (μM) | 24 h                                 |            |            |            | 48 h           |             |            |            |
|--------------------|--------------------------------------|------------|------------|------------|----------------|-------------|------------|------------|
|                    | Cell cycle distribution [% of cells] |            |            |            |                |             |            |            |
|                    | Sub-G1                               | G0/G1      | S          | G2         | Sub-G1         | G0/G1       | S          | G2         |
| 0                  | 11.56±5.5                            | 41.93±6.15 | 26.36±2.04 | 20.35±3.78 | 8.6±2.85       | 40.57±1.8   | 28.8±1.53  | 22.71±1.92 |
| 2.5                | 15.53±2.23                           | 41.14±1.03 | 21.59±1.77 | 22.35±1.19 | 21.49±0.94**   | 35.8±1.49   | 26.22±0.97 | 16.99±2    |
| 5                  | 21.32±6.2*                           | 38.23±6.83 | 18.68±2.58 | 21.31±4.02 | 25.53±7.59***  | 40.3±3.15   | 19.12±2.51 | 15.23±5.04 |
| 10                 | 23.53±7.04**                         | 38.08±9.38 | 21.4±3.5   | 17.45±2.75 | 28.01±5.09***  | 38.5±2.77   | 18.61±4.5  | 18.78±2.32 |
| 20                 | 24.09±2.62**                         | 42.63±4.03 | 19.83±2.92 | 15.7±5.79  | 29.68±10.49*** | 31.66±10.94 | 20.74±2.14 | 17.47±1.42 |

**Table S3.** Effect of compound **3a** on cell cycle distribution in the A549 cell line culture. After the treatment with various concentrations of compound 1 for 24 and 48 h, the cells were stained with propidium iodide and analyzed by flow cytometry. \* $p < 0.05$ , and  $p < 0.001$ \*\*\* in comparison to the control; one-way ANOVA test

| Concentration (μM) | 24 h                                 |               |            |            | 48 h          |               |           |           |
|--------------------|--------------------------------------|---------------|------------|------------|---------------|---------------|-----------|-----------|
|                    | Cell cycle distribution [% of cells] |               |            |            |               |               |           |           |
|                    | sub-G1                               | G0/G1         | S          | G2/M       | sub-G1        | G0/G1         | S         | G2/M      |
| 0                  | 8.29±4.27                            | 64.55±2.73    | 13.13±2.69 | 14.49±2.12 | 13.81±4.87    | 70.70±6.85    | 7.22±2.75 | 8.41±1.53 |
| 2.5                | 8.81±3.73                            | 64.49±1.89    | 12.39±2.34 | 14.68±2.11 | 11.98±3.62    | 73.22±1.97    | 6.07±1.54 | 8.91±2.22 |
| 5                  | 8.94±3.39                            | 65.90±2.36    | 12.18±2.45 | 13.62±2.25 | 15.74±6.03    | 68.55±8.03    | 6.81±2.66 | 9.05±1.72 |
| 10                 | 13.23±7.01                           | 66.51±4.46    | 9.82±2.73  | 11.43±2.88 | 16.15±6.33    | 68.54±6.87    | 7.07±2.63 | 8.44±1.47 |
| 20                 | 22.36±12.24***                       | 66.45±9.20    | 5.23±2.38* | 7.16±2.15  | 27.32±6.78*** | 63.07±6.59*   | 4.61±1.21 | 5.19±0.93 |
| 40                 | 35.46±9.33***                        | 41.03±2.93*** | 11.34±0.58 | 12.87±5.29 | 75.27±4.12*** | 16.49±3.46*** | 6.05±0.87 | 2.19±0.38 |

**Table S4.** Effects of compound **3a** on apoptosis (early + late apoptosis) induction in the RPMI 8226 cells. After the 24-h and 48-h exposure, the cells were stained with AnnexinV-FITC/propidium iodide and examined with flow cytometry. Statistically significant at  $p < 0.01$ \*\* or at  $p < 0.001$ \*\*\* in comparison to the vehicle control; one-way ANOVA test.

| Concentration [μM] | 24 hours                    |                            | 48 hours                    |                            |
|--------------------|-----------------------------|----------------------------|-----------------------------|----------------------------|
|                    | Apoptosis [% of cells ± SD] | Necrosis [% of cells ± SD] | Apoptosis [% of cells ± SD] | Necrosis [% of cells ± SD] |
| 0                  | 14.33 ± 0.87                | 5.03 ± 0.86                | 12.99 ± 2.44                | 5.48 ± 2.25                |
| 2.5                | 19.53 ± 2.64**              | 3.62 ± 0.87                | 20.93 ± 1.83***             | 5.54 ± 0.44                |
| 5                  | 22.23 ± 6.01**              | 6.35 ± 2.57                | 31.71 ± 11.36***            | 7.53 ± 2.61                |
| 10                 | 39.58 ± 9.33***             | 9.94 ± 2.73                | 58.25 ± 21.57***            | 11.08 ± 5.38               |
| 20                 | 60.41 ± 0.99***             | 18.5 ± 2.38***             | 76.93 ± 14.34***            | 20.18 ± 11.99***           |

**Table S5.** Effects of compound **3a** on apoptosis (early + late apoptosis) induction in the A549 cells. After the 24-h and 48-h exposure, the cells were stained with AnnexinV-FITC/propidium iodide and examined with flow cytometry. Statistically significant at  $p < 0.01^{**}$  or at  $p < 0.001^{***}$  in comparison to the vehicle control; one-way ANOVA test.

| Concentration [ $\mu$ M] | 24 hours                         |                                | 48 hours                        |                                |
|--------------------------|----------------------------------|--------------------------------|---------------------------------|--------------------------------|
|                          | Apoptosis [% of cells $\pm$ SD]  | Necrosis [% of cells $\pm$ SD] | Apoptosis [% of cells $\pm$ SD] | Necrosis [% of cells $\pm$ SD] |
| 0                        | 14.14 $\pm$ 1.77                 | 4.72 $\pm$ 1.29                | 13.65 $\pm$ 3.71                | 5.01 $\pm$ 2.20                |
| 2.5                      | 14.30 $\pm$ 2.21                 | 4.79 $\pm$ 1.14                | 18.41 $\pm$ 3.95                | 4.11 $\pm$ 1.44                |
| 5                        | 14.82 $\pm$ 2.42                 | 4.40 $\pm$ 1.66                | 22.48 $\pm$ 8.36                | 4.93 $\pm$ 4.26                |
| 10                       | 18.18 $\pm$ 2.52                 | 4.87 $\pm$ 1.35                | 27.17 $\pm$ 11.71 <sup>**</sup> | 4.09 $\pm$ 2.58                |
| 20                       | 23.43 $\pm$ 4.57 <sup>**</sup>   | 4.56 $\pm$ 1.90                | 40.20 $\pm$ 9.87 <sup>***</sup> | 4.87 $\pm$ 3.04                |
| 40                       | 73.96 $\pm$ 19.94 <sup>***</sup> | 7.89 $\pm$ 1.10                | 89.43 $\pm$ 6.65 <sup>***</sup> | 8.81 $\pm$ 6.51                |

### 3a

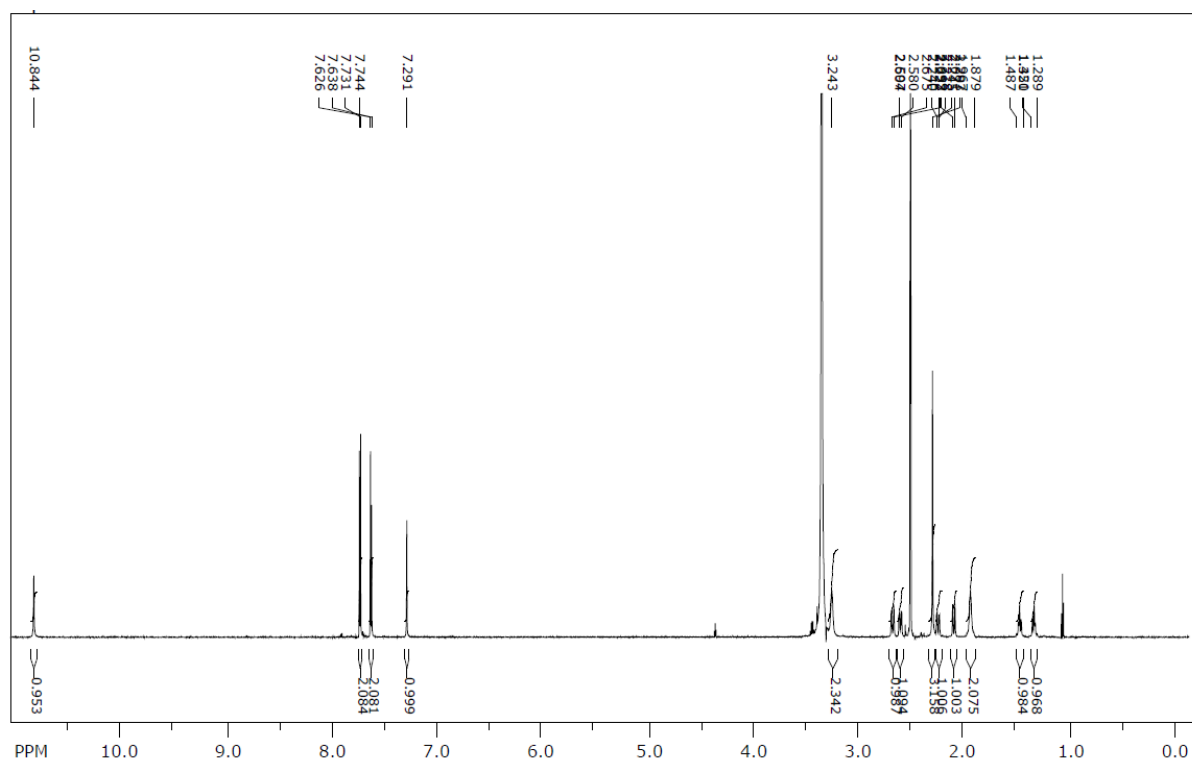

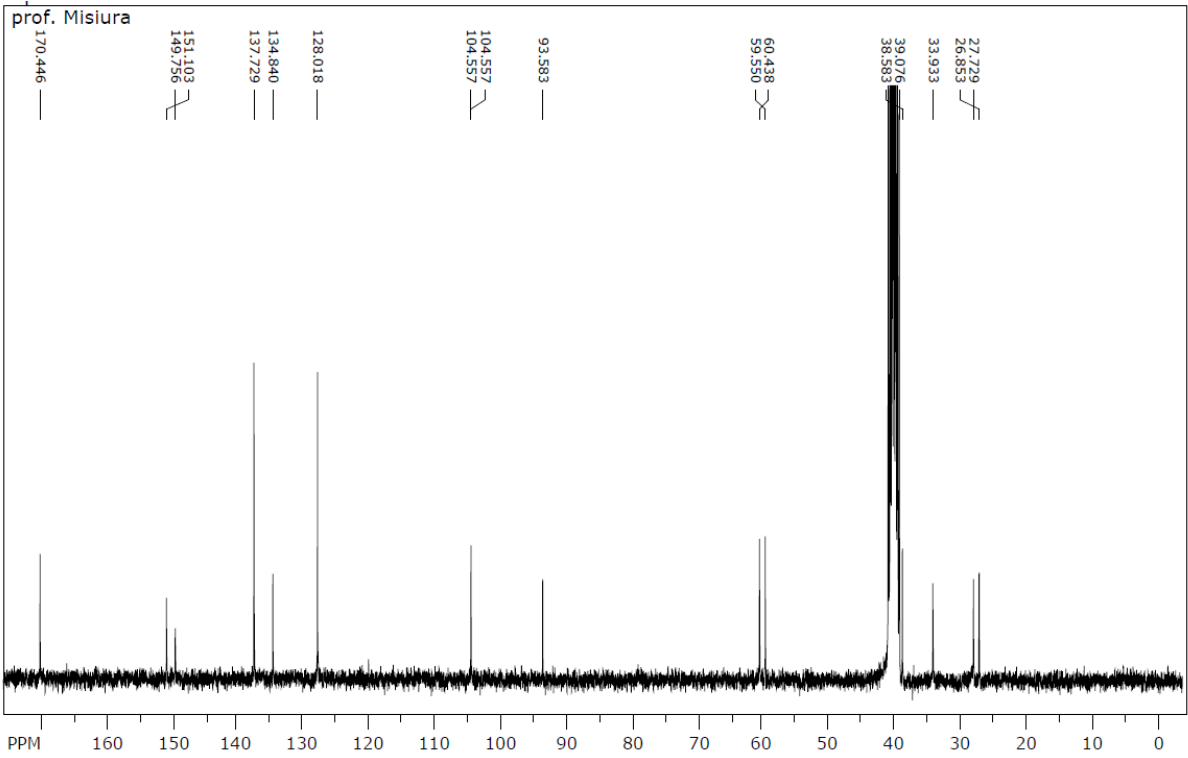

200430\_K1A 57 (0.597) Cm (57:69)

TOF MS ES+  
2.52e7

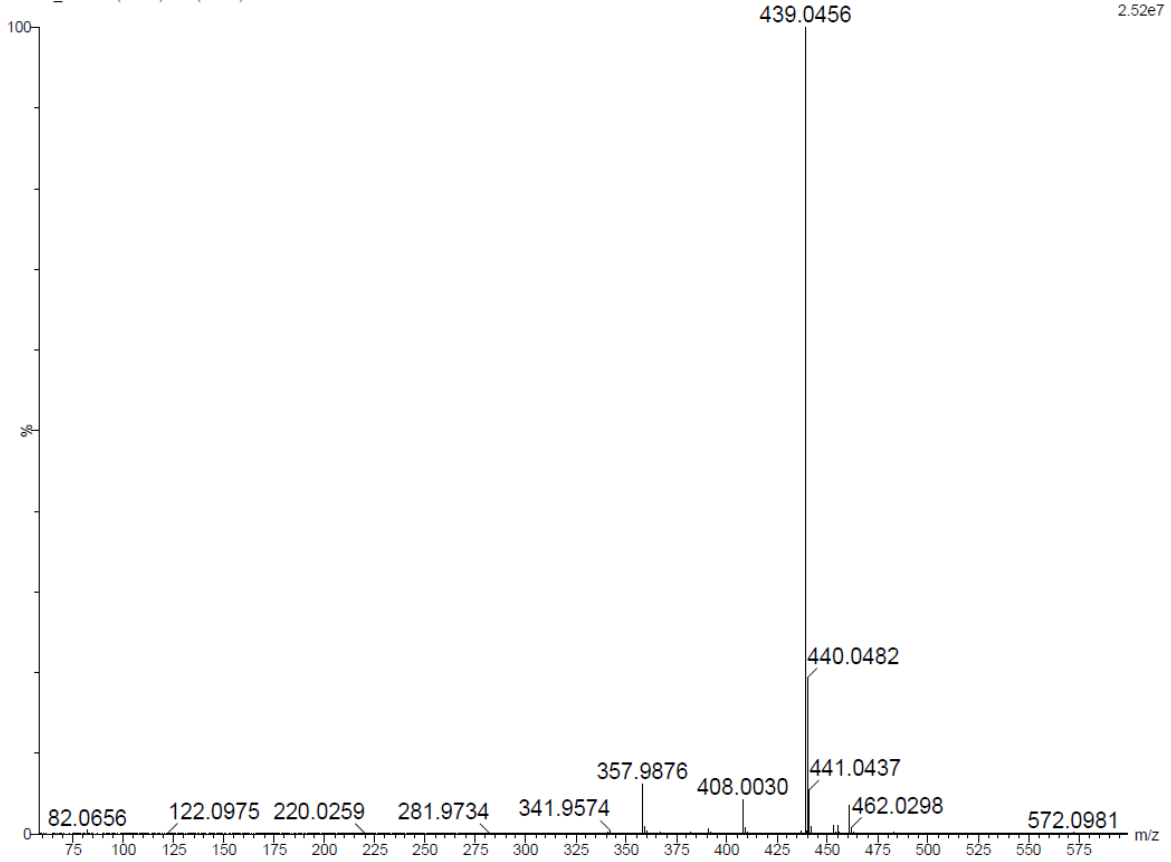

3b

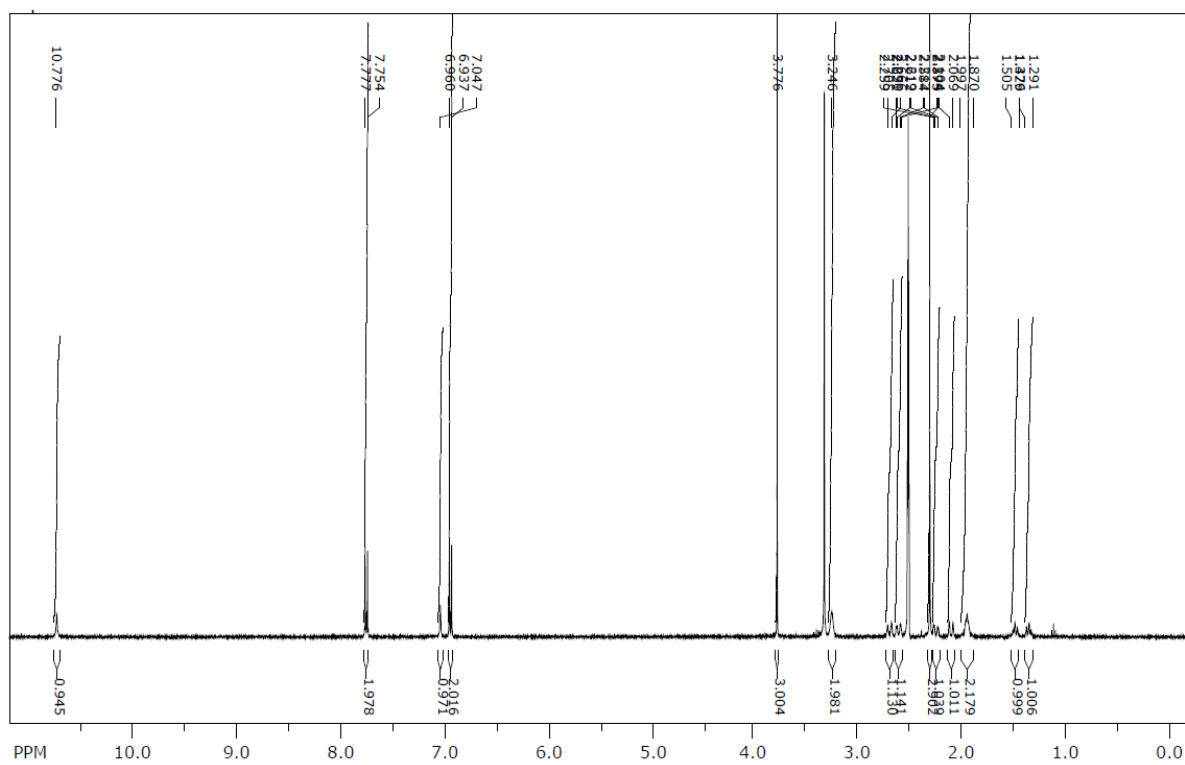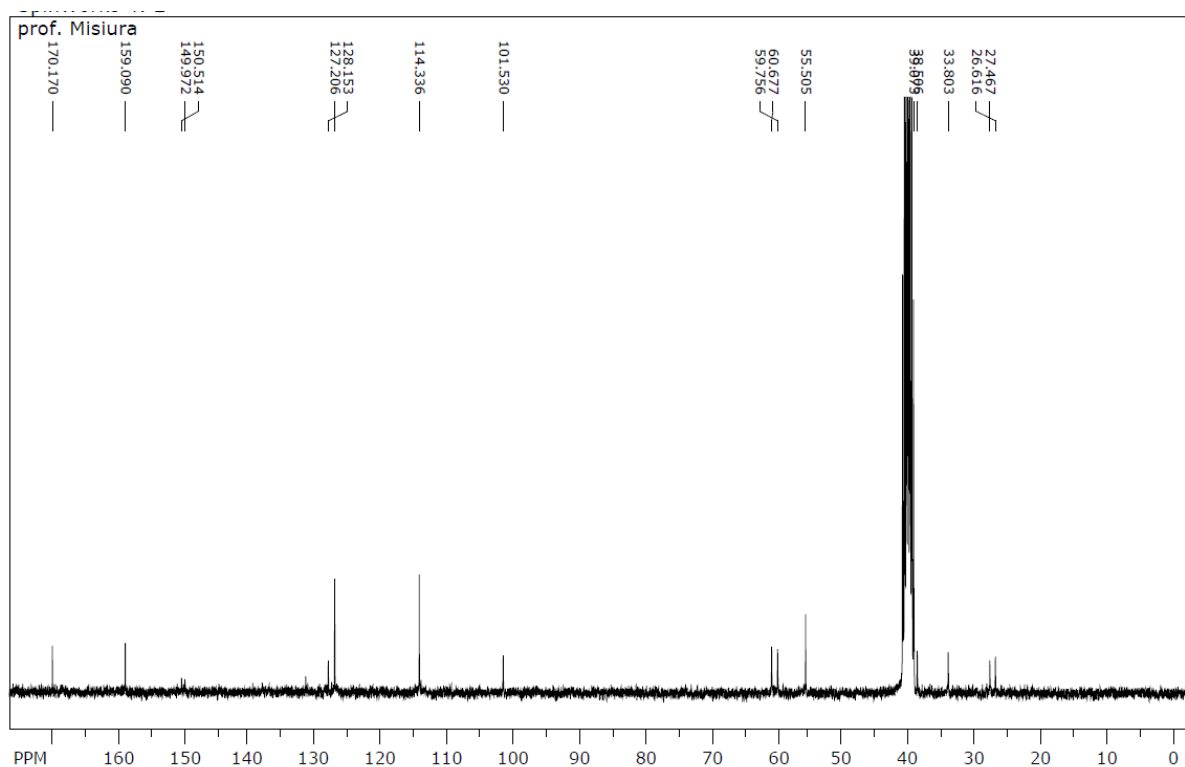

200430\_K2A 49 (0.517) Cm (44:67-4:25)

TOF MS ES+  
9.50e6

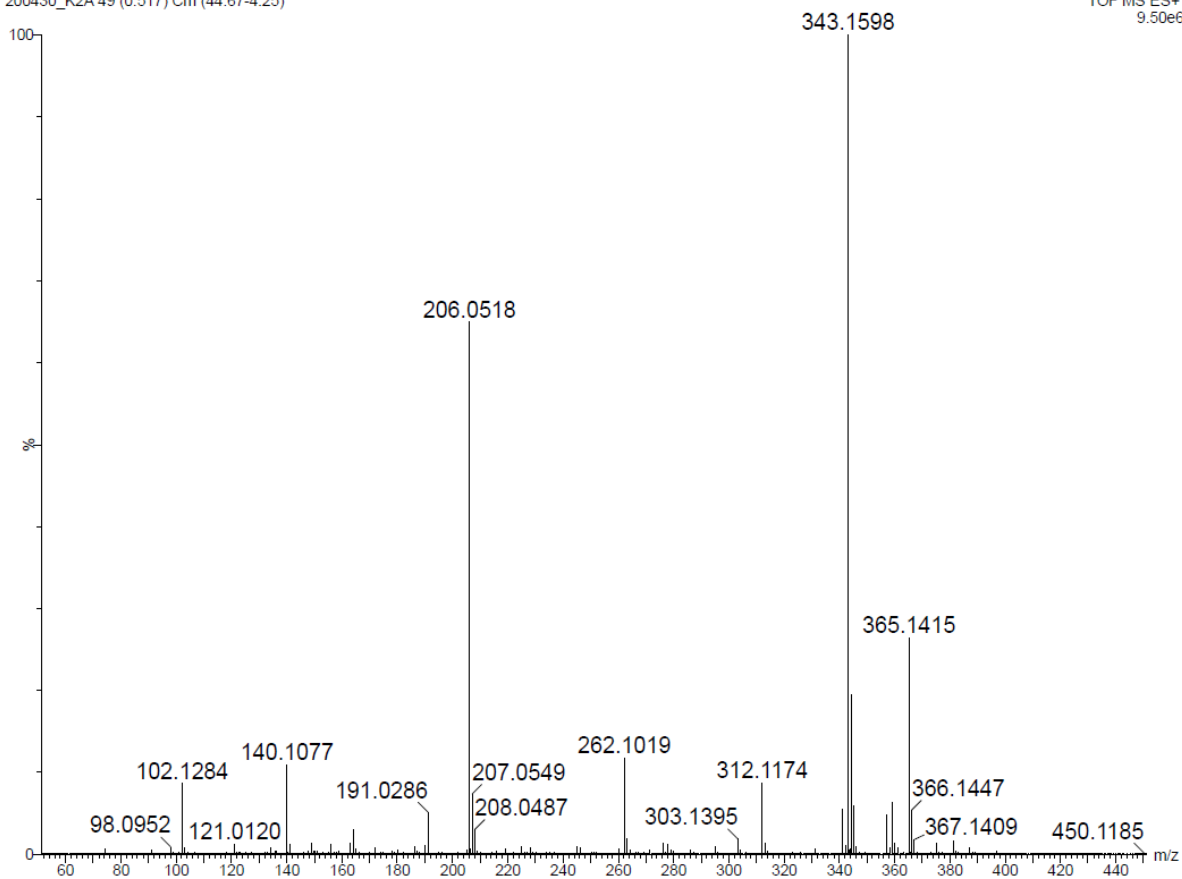

3c

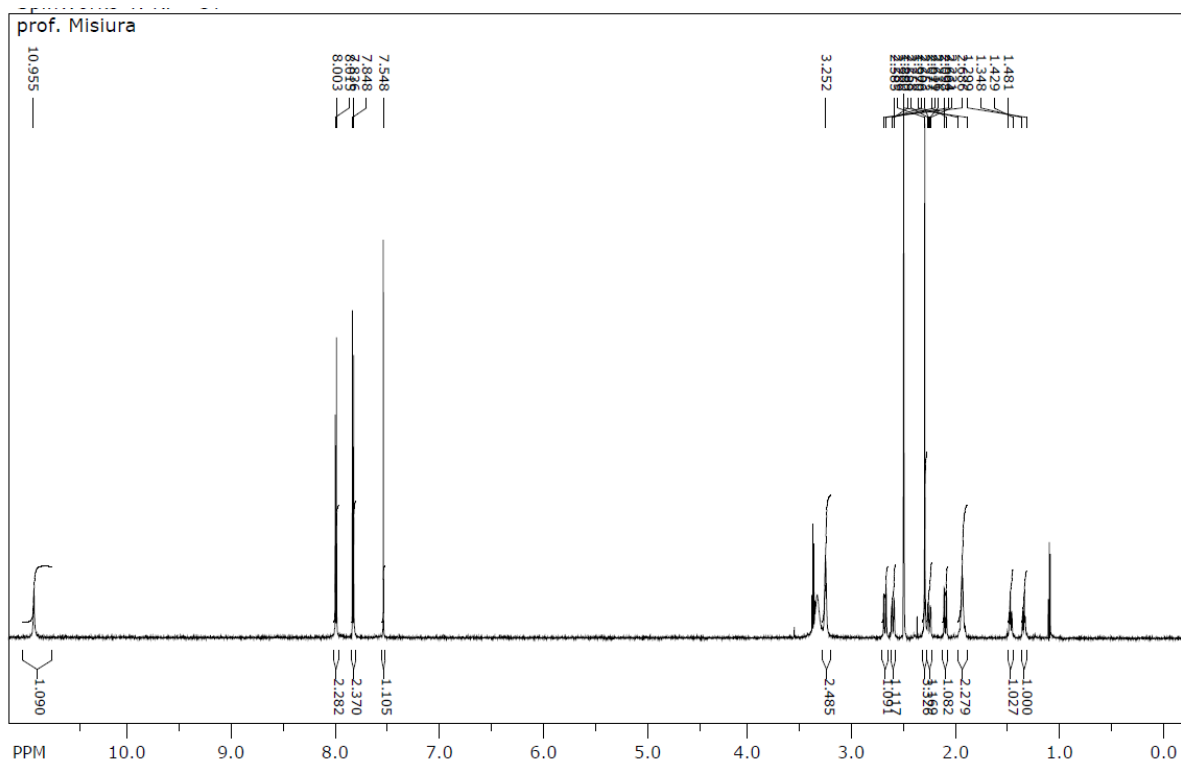

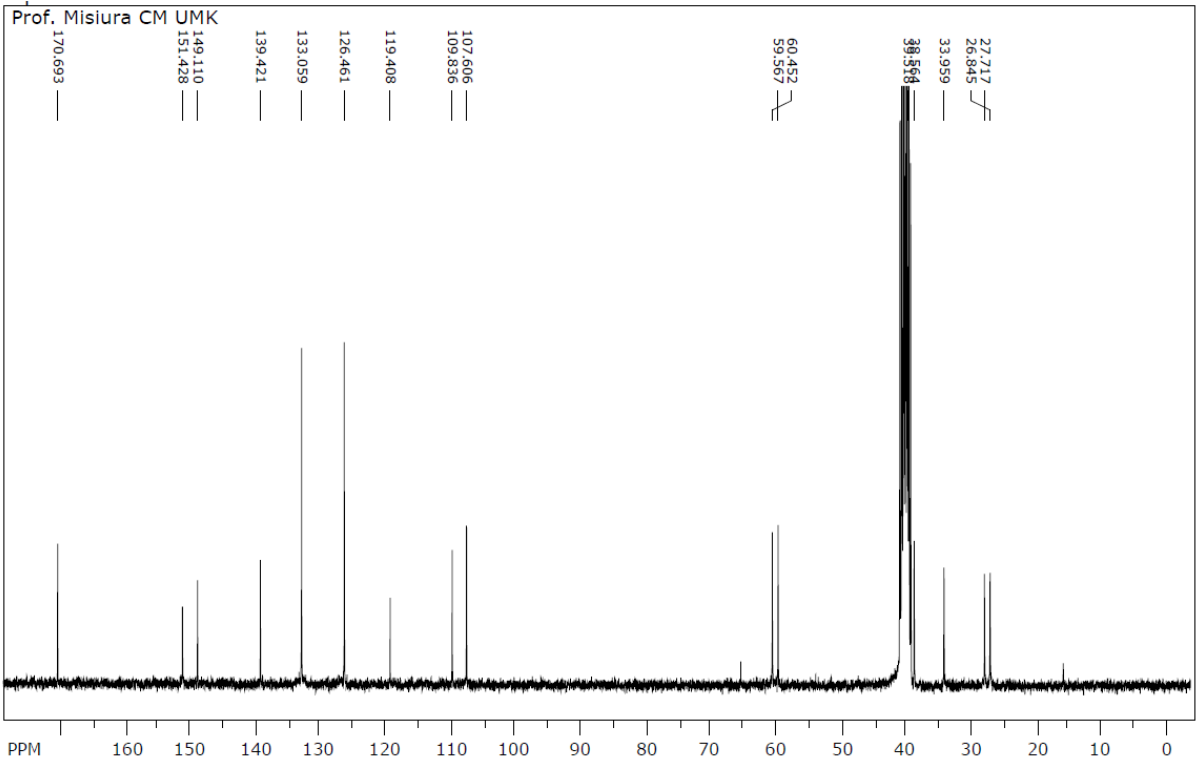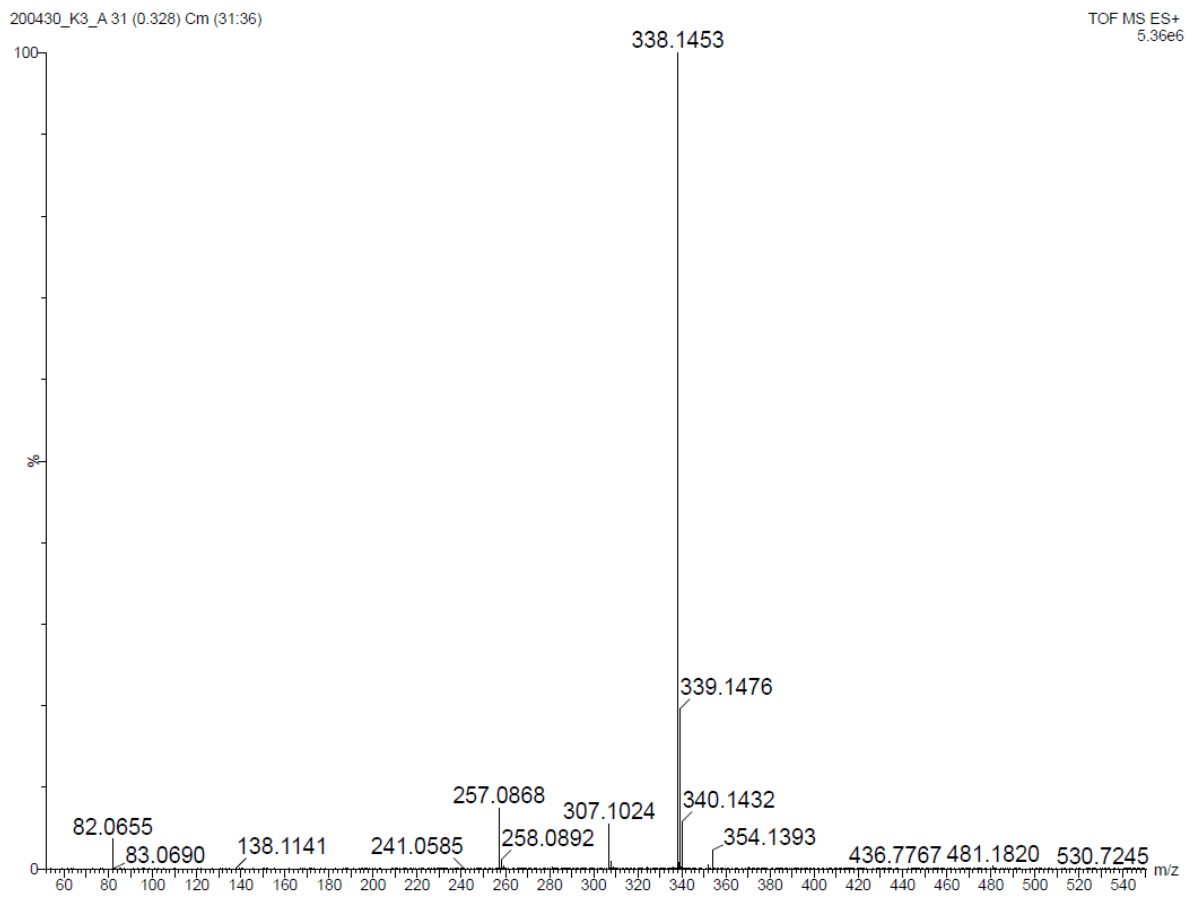

3d

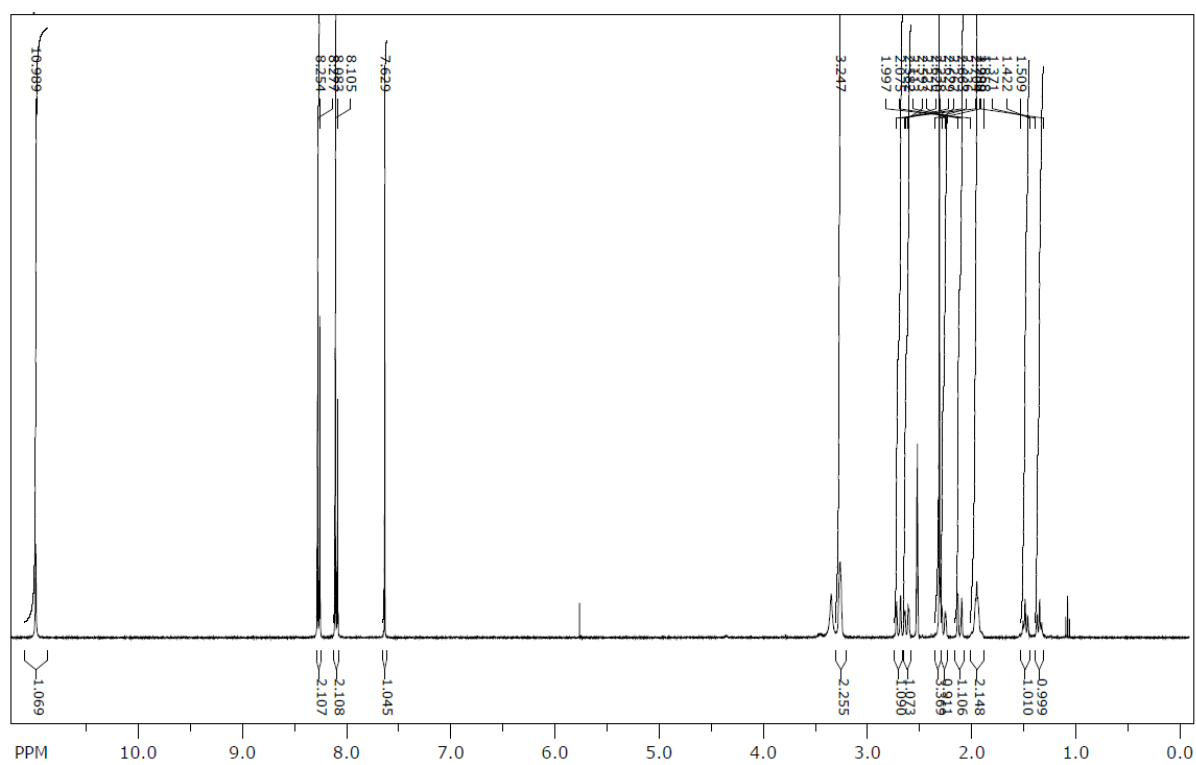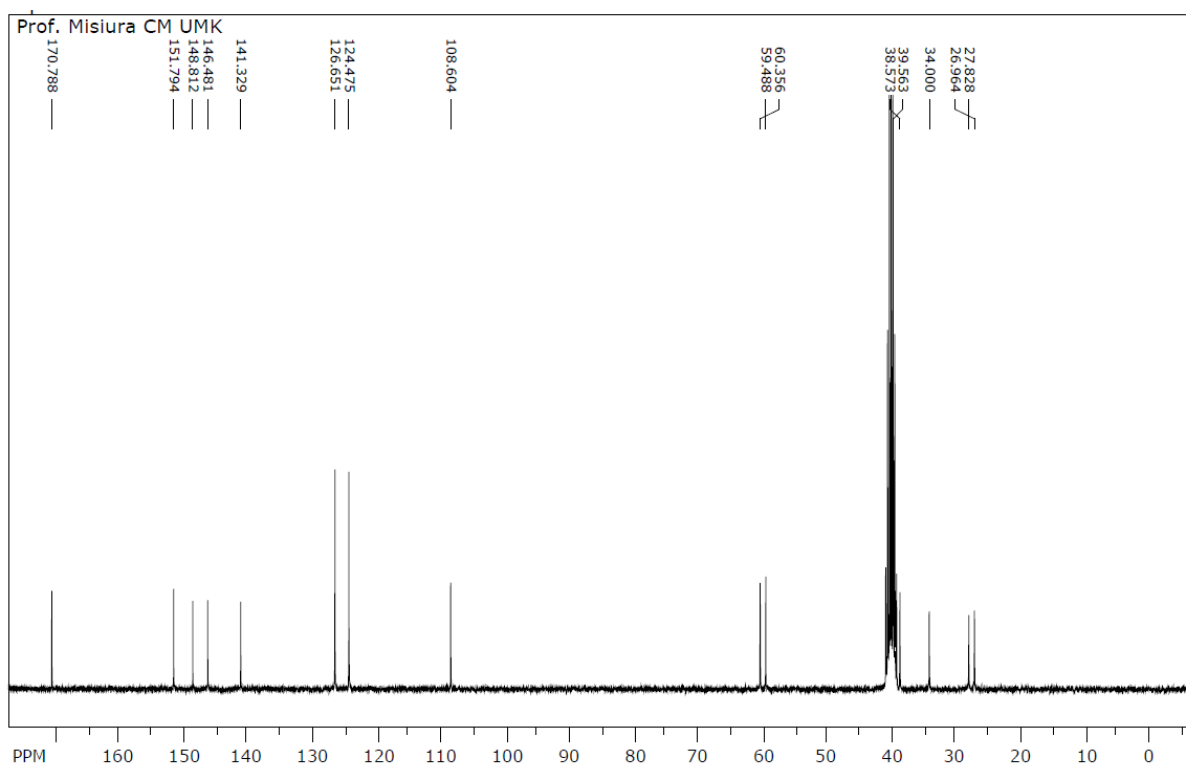



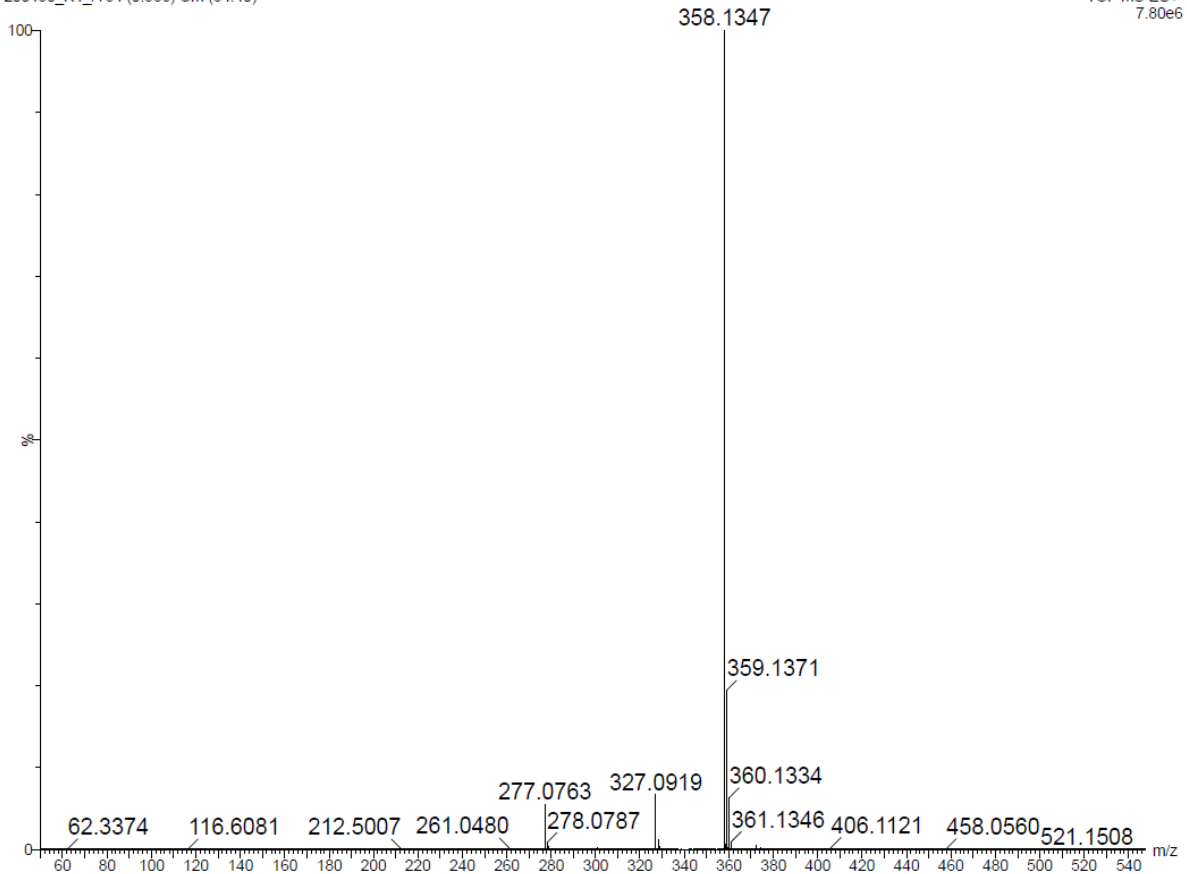

3e

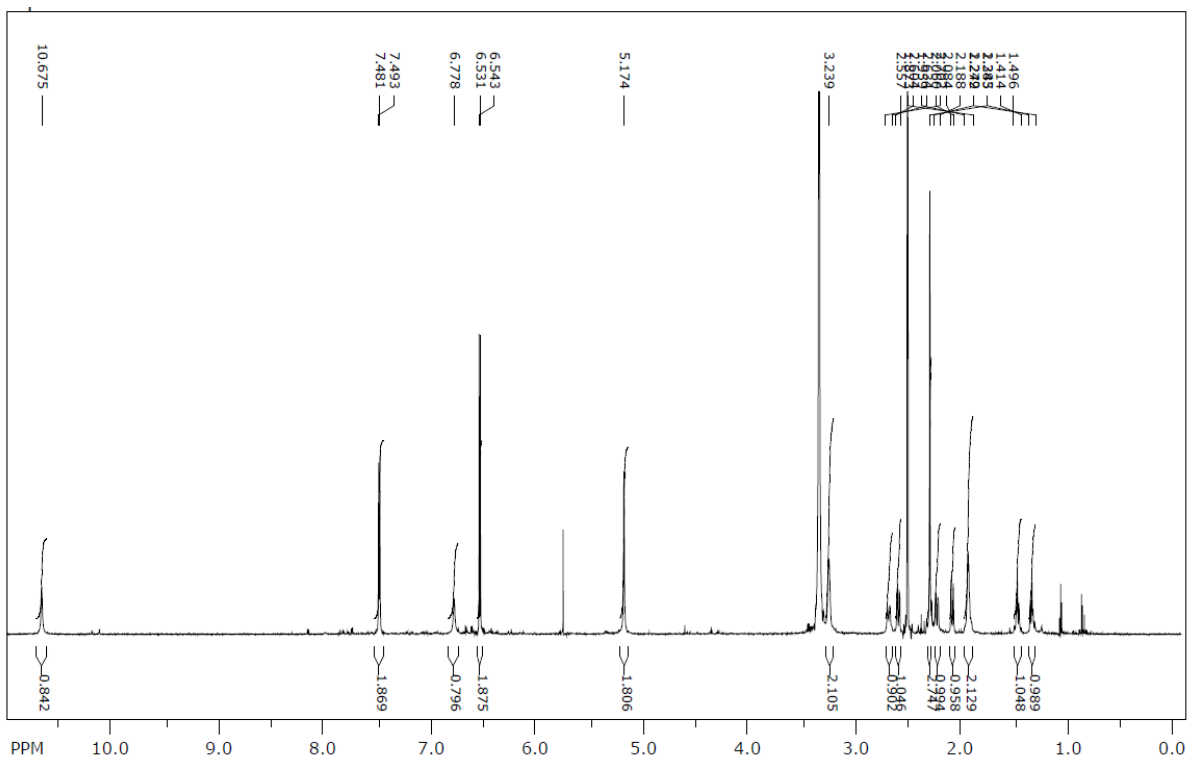

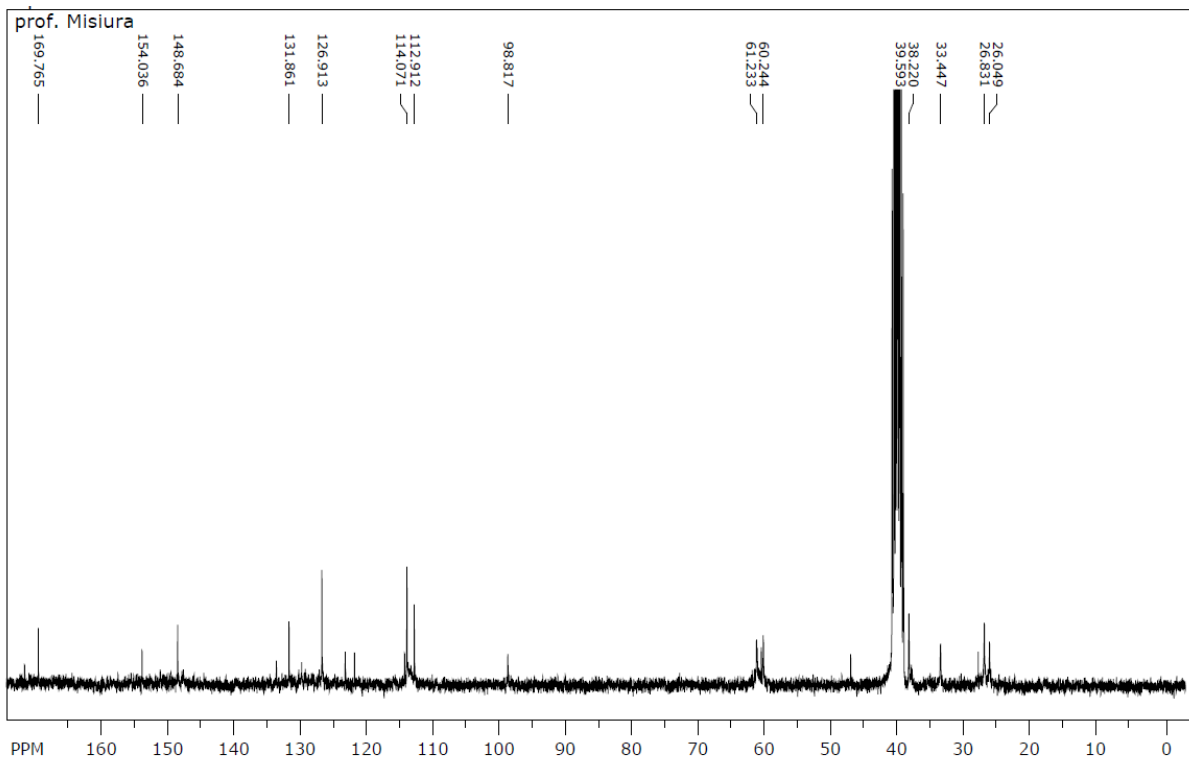

200430\_K5\_A.37 (0.391) Cm (37:49-(88:96+2:10))

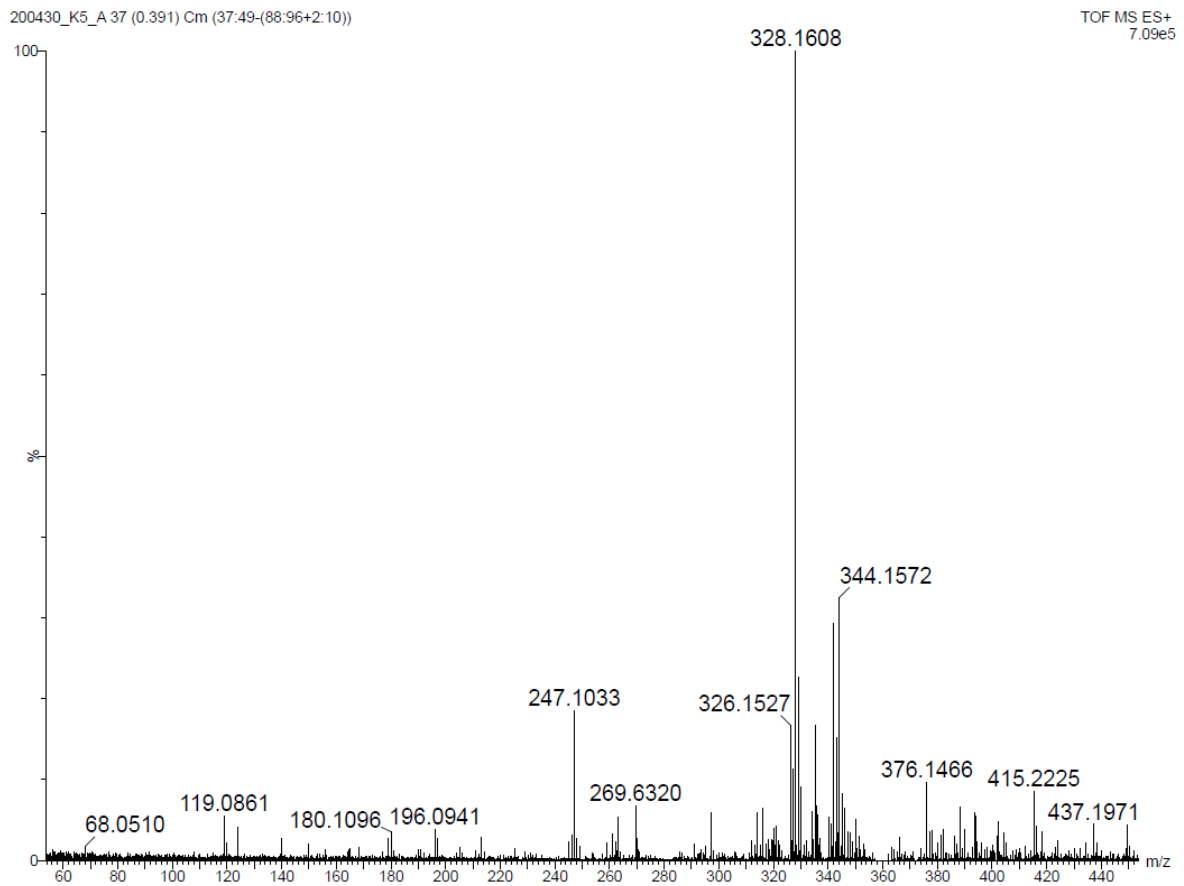

3f

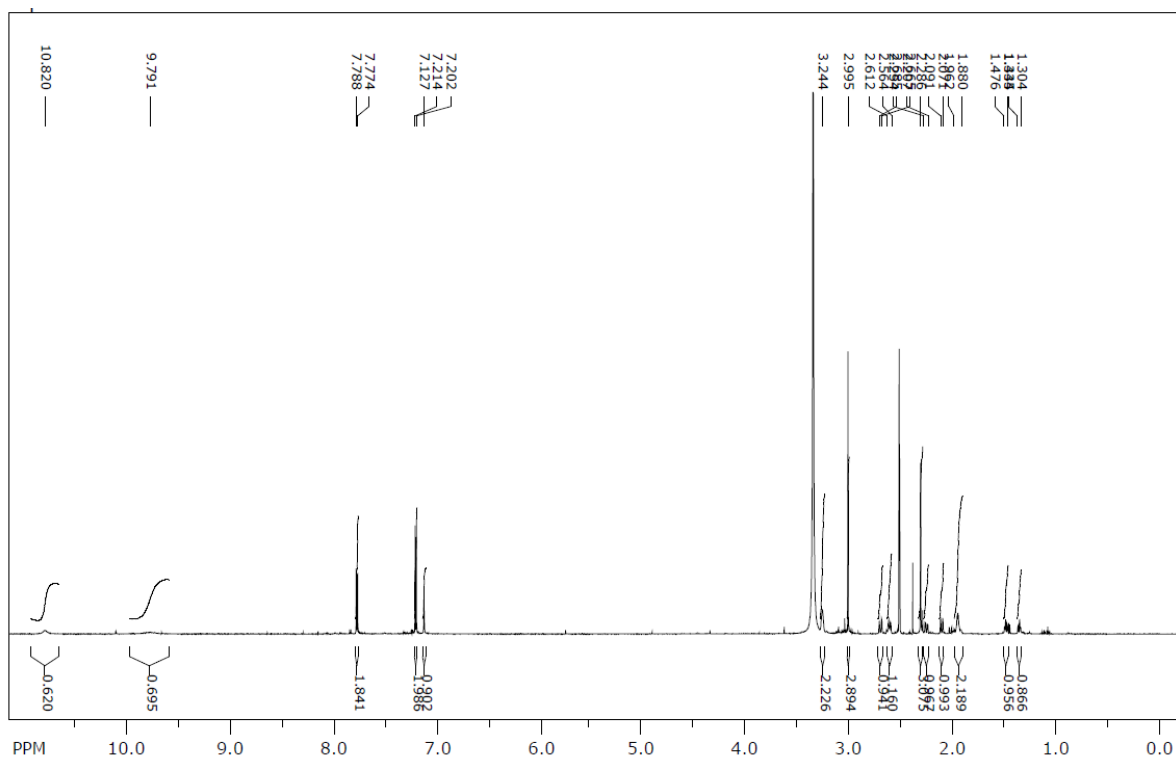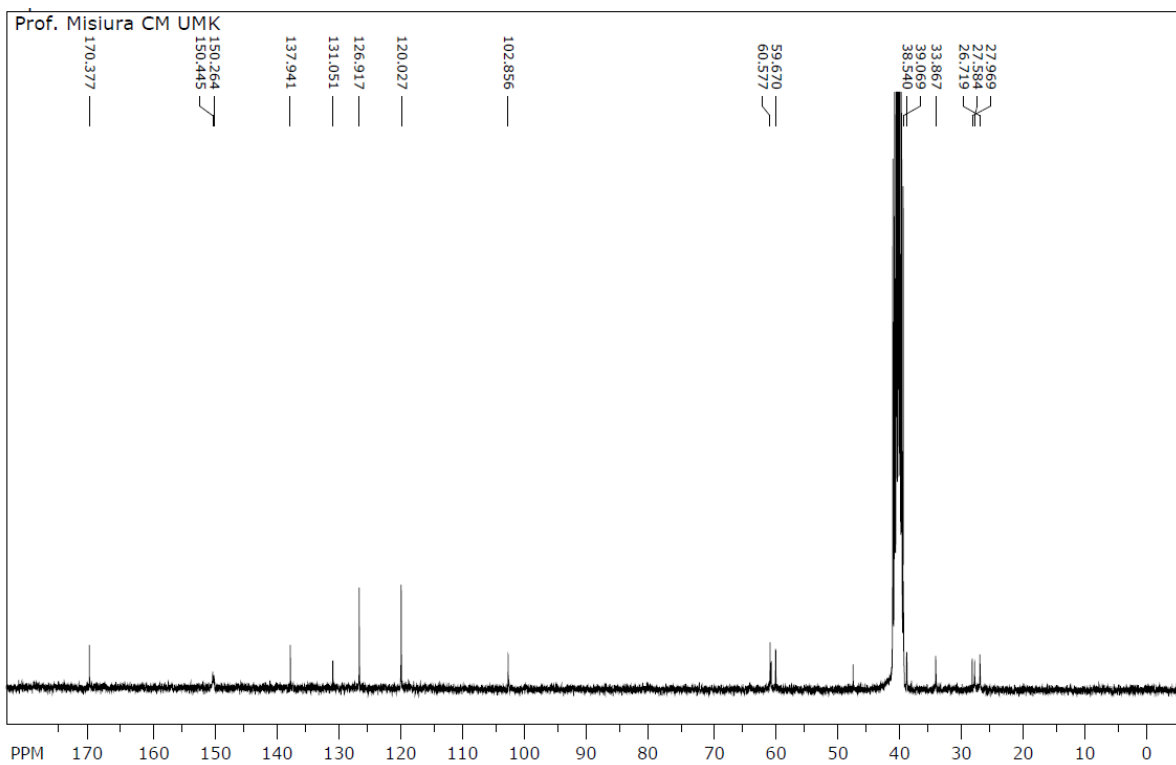



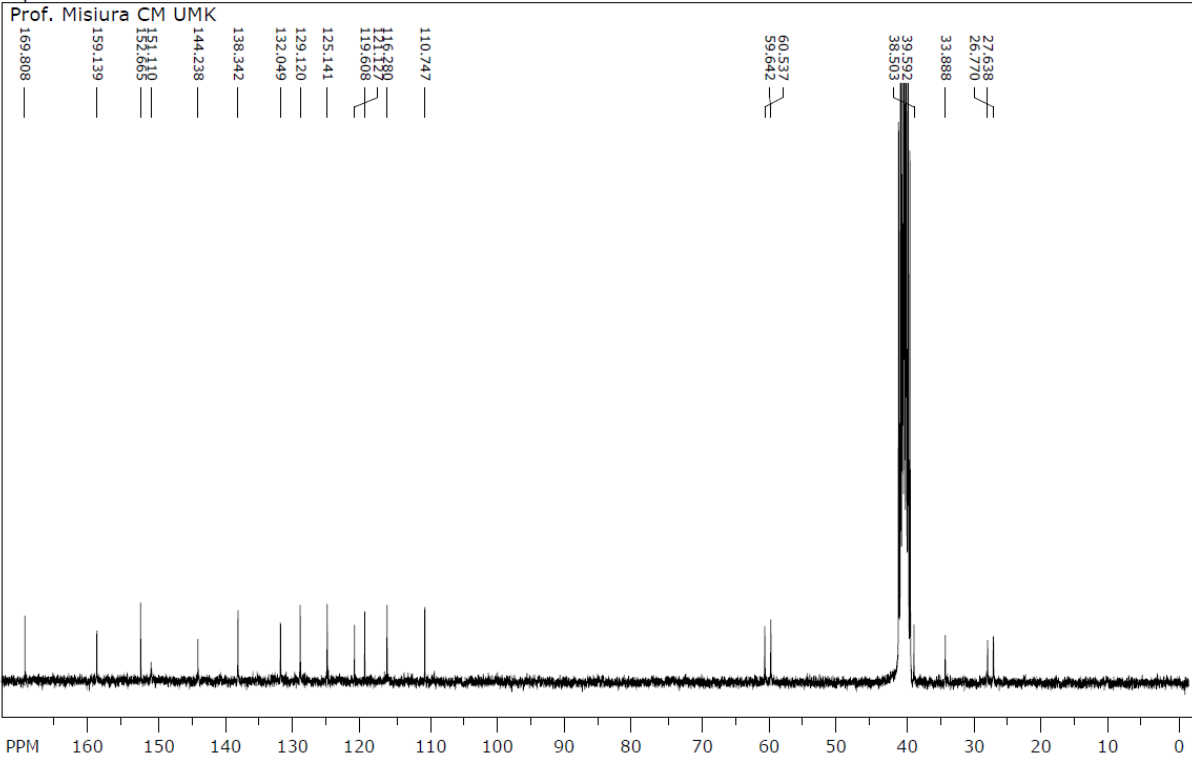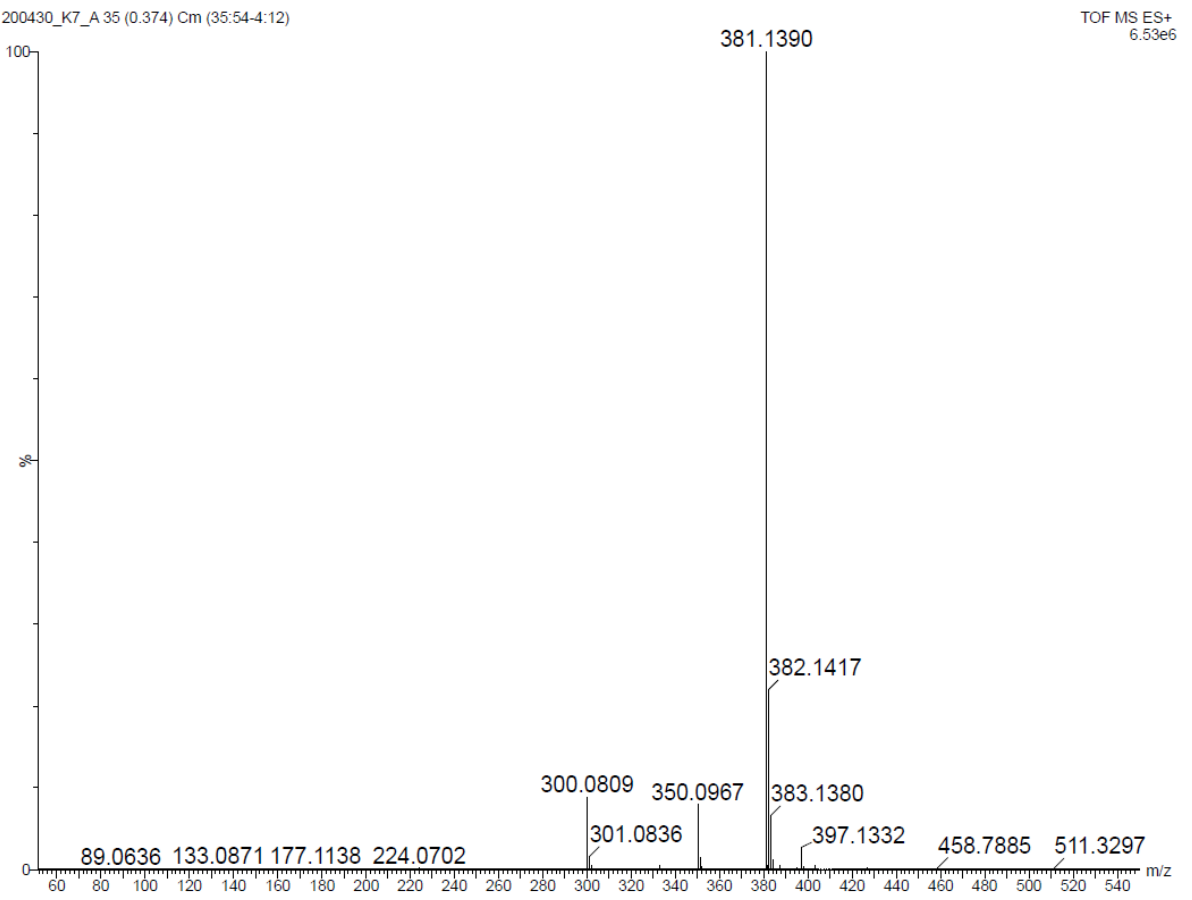

3h

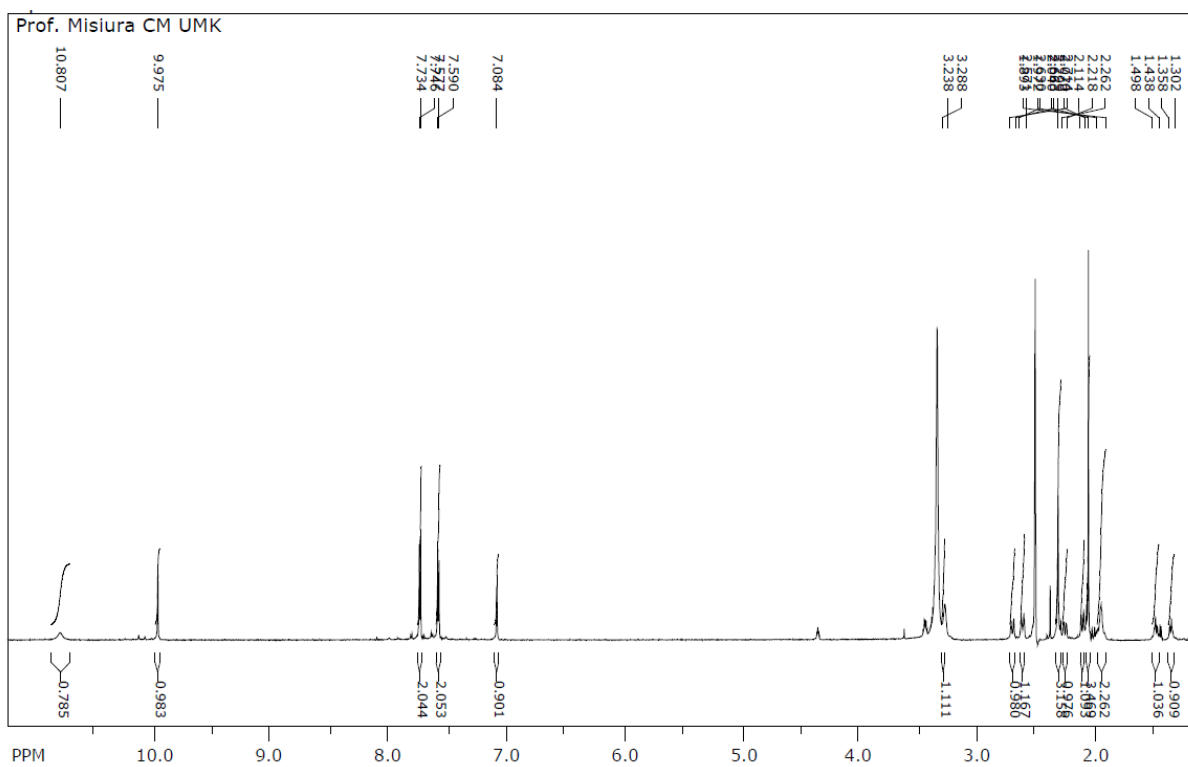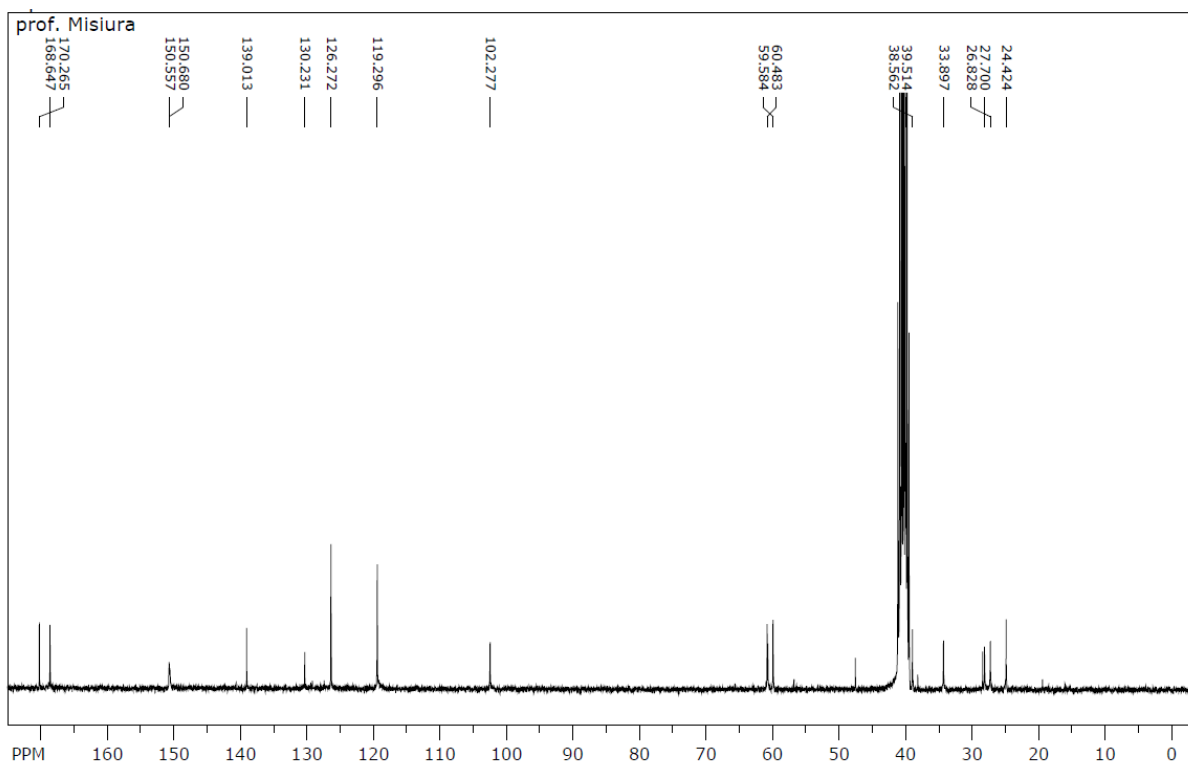

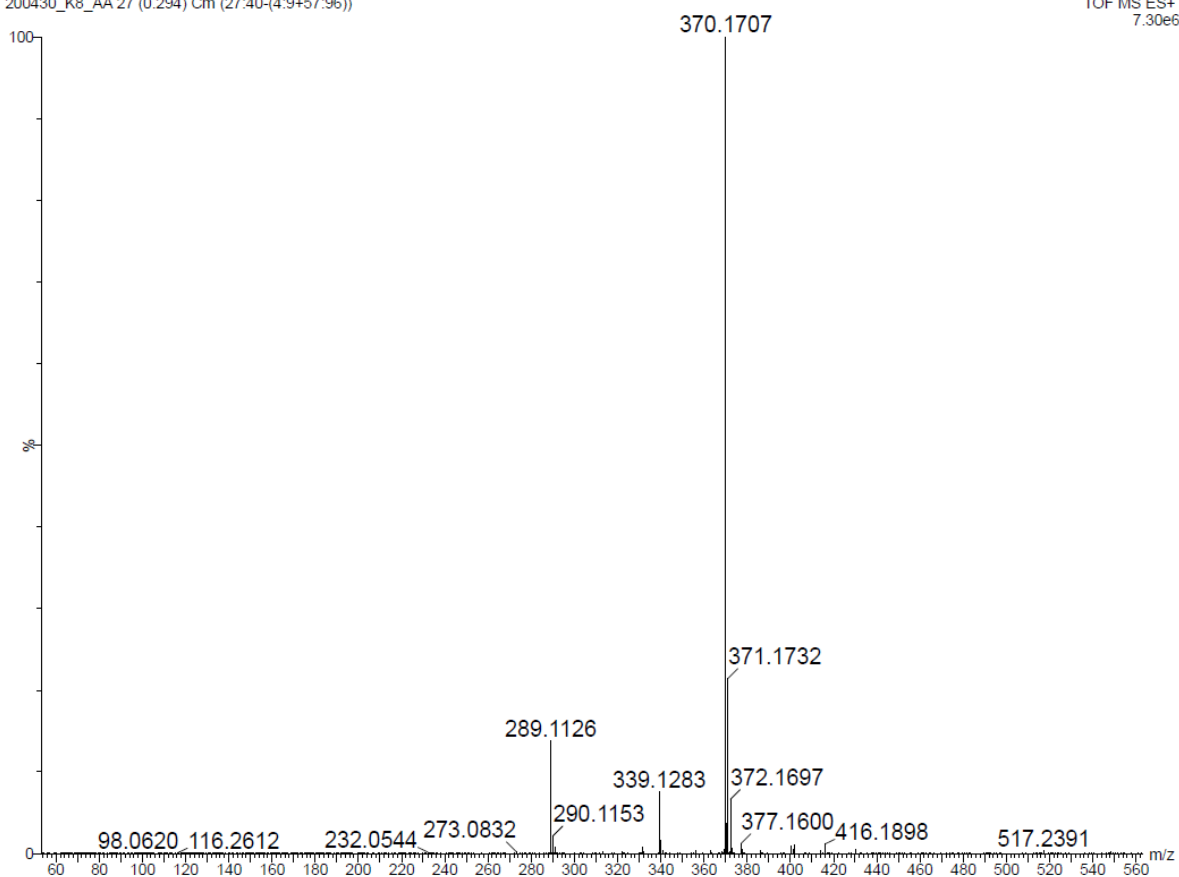

### 3a-HOMO

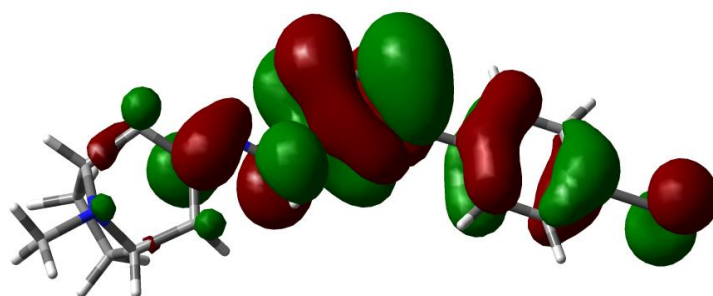

**3a-LUMO**

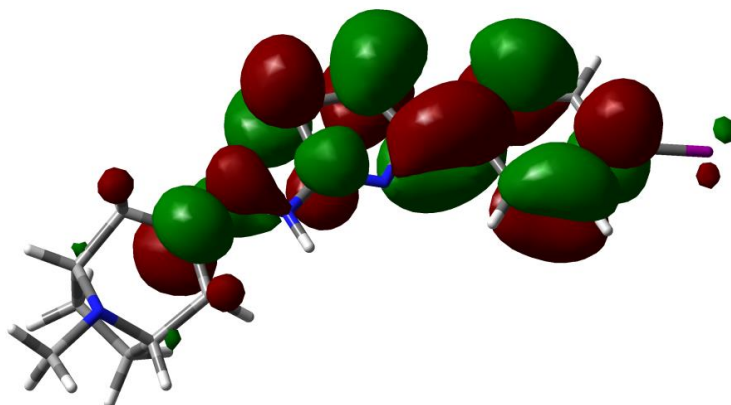

**3b-HOMO**

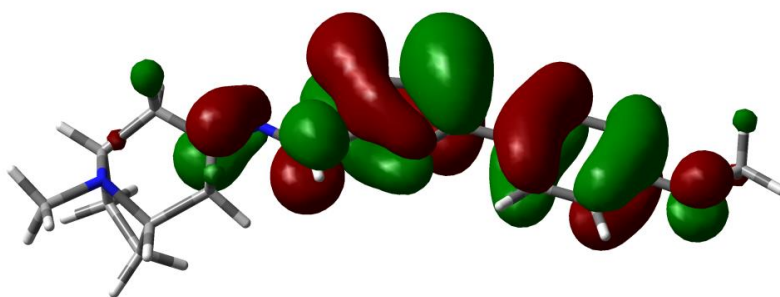

**3b-LUMO**

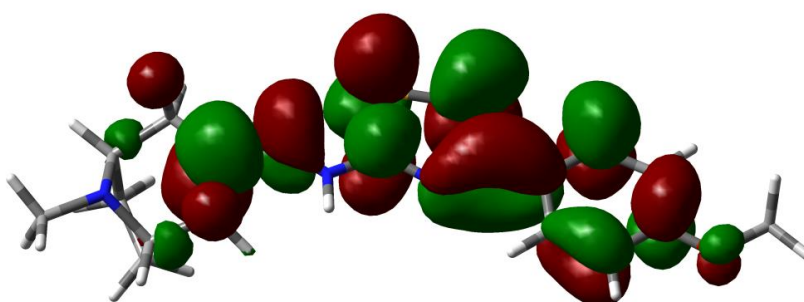

**3c-HOMO**

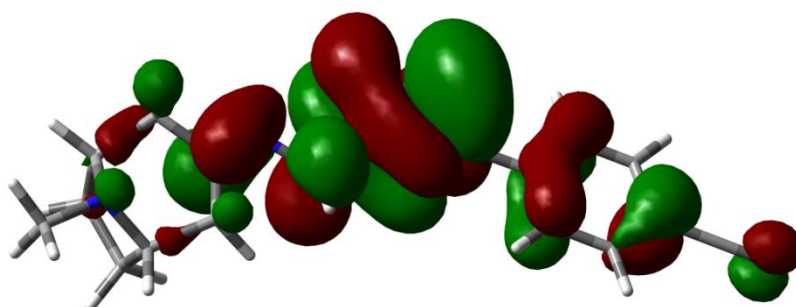



**3c-LUMO**

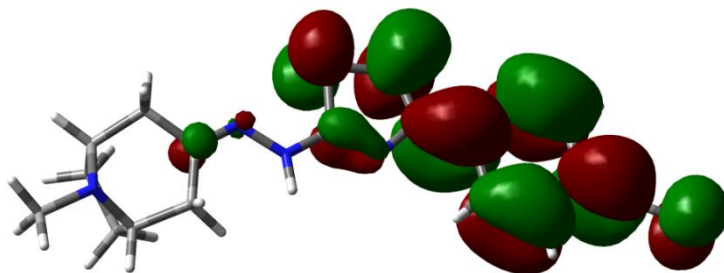

**3d-HOMO**

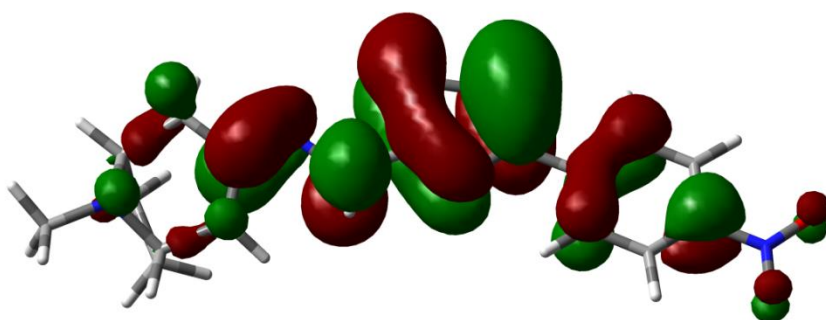

**3d-LUMO**

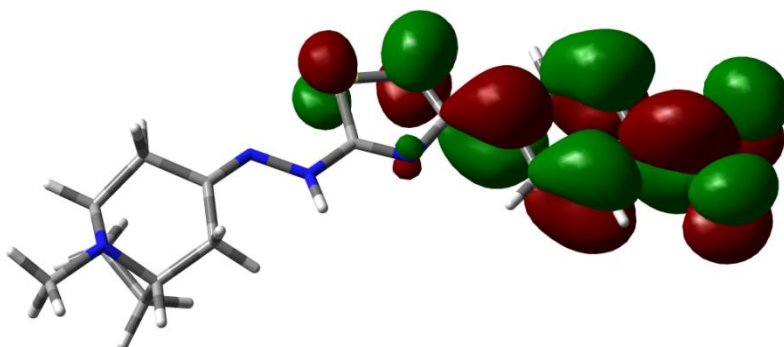

**3e-HOMO**

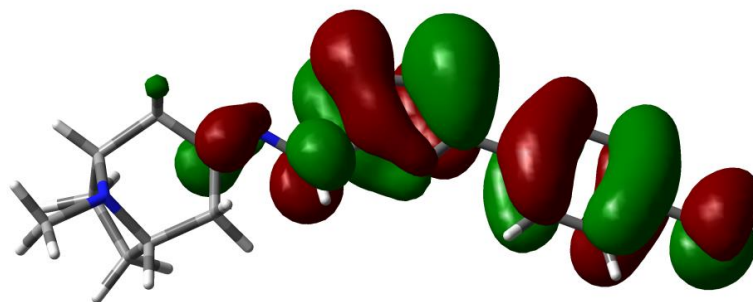

**3e-LUMO**

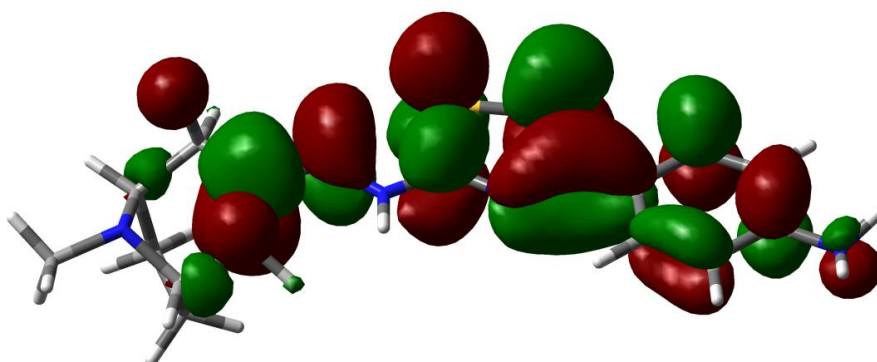

**3f-HOMO**

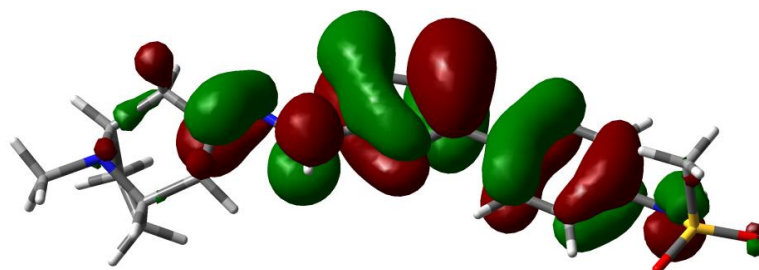

**3f-LUMO**

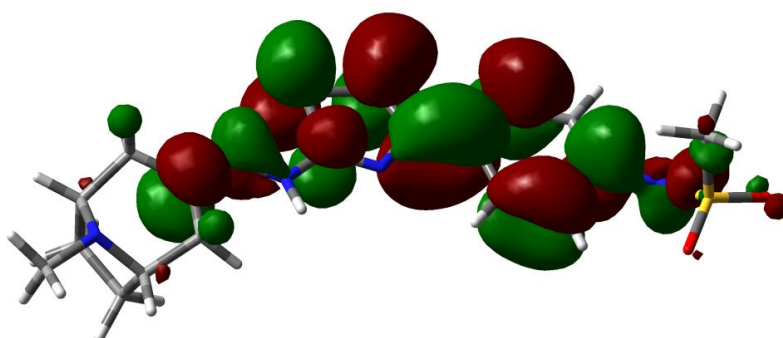

**3g-HOMO**

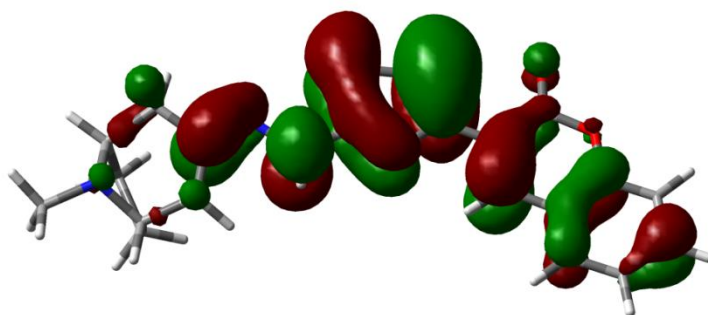

**3g-LUMO**

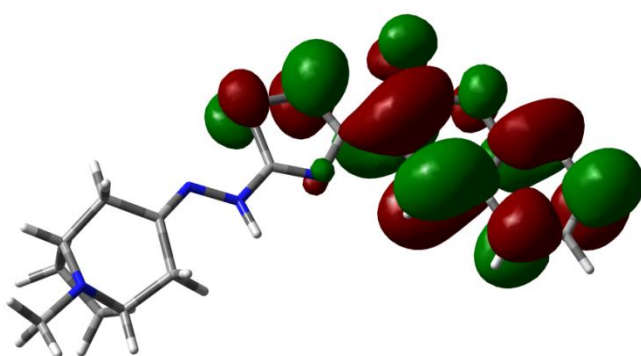

**3h-HOMO**

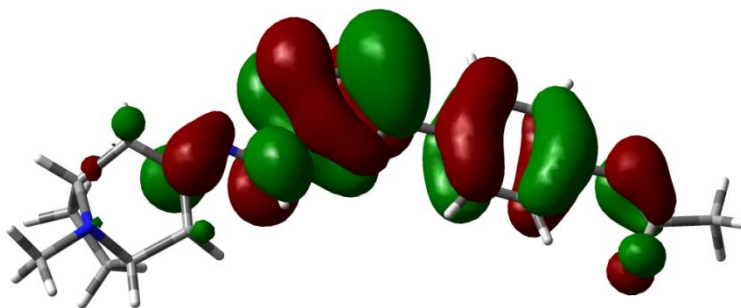

**3h-LUMO**

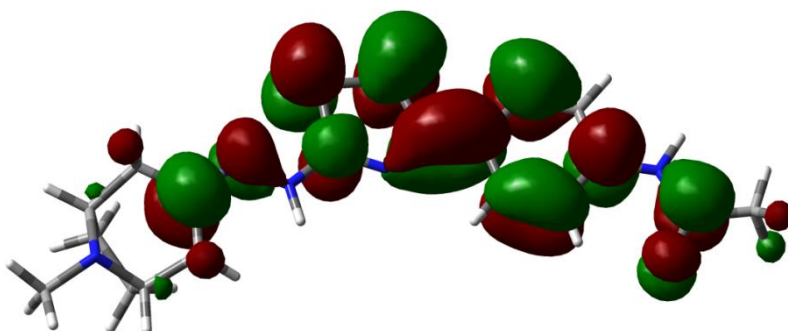

Geometrical parameters of the investigated compounds **3a-3h**.

**3a**

|   |           |           |           |
|---|-----------|-----------|-----------|
| C | 6.219519  | -1.800700 | 0.071662  |
| C | 6.281359  | -1.356748 | 1.564416  |
| C | 6.954401  | 0.041600  | 1.504665  |
| C | 7.206689  | 0.264051  | -0.015559 |
| N | 7.318579  | -1.087679 | -0.602102 |
| C | 6.013896  | 0.954744  | -0.699862 |
| C | 4.895781  | -1.363732 | -0.592391 |
| C | 4.747389  | 0.143257  | -0.548161 |
| C | 8.626767  | -1.708985 | -0.408964 |
| N | 3.651911  | 0.793698  | -0.399481 |
| N | 2.470416  | 0.125229  | -0.312440 |
| C | 1.305809  | 0.832471  | -0.175670 |
| S | 1.318609  | 2.576170  | 0.049455  |
| C | -0.422897 | 2.500634  | 0.132989  |
| C | -0.866141 | 1.216848  | -0.013024 |
| N | 0.135730  | 0.274015  | -0.187837 |
| C | -2.268831 | 0.764373  | -0.000011 |
| C | -2.565270 | -0.596588 | -0.153636 |
| C | -3.879369 | -1.054913 | -0.145404 |
| C | -4.917732 | -0.145308 | 0.018293  |
| C | -4.654770 | 1.213195  | 0.172954  |
| C | -3.337830 | 1.657268  | 0.162632  |
| I | -6.942665 | -0.836968 | 0.032705  |
| H | 6.341169  | -2.878785 | -0.051467 |
| H | 6.881517  | -2.058191 | 2.147476  |

|   |           |           |           |
|---|-----------|-----------|-----------|
| H | 5.290735  | -1.325979 | 2.023239  |
| H | 6.325931  | 0.826668  | 1.929528  |
| H | 7.895876  | 0.048034  | 2.057680  |
| H | 8.117932  | 0.832485  | -0.212343 |
| H | 6.251067  | 1.046747  | -1.766349 |
| H | 5.843454  | 1.958804  | -0.305730 |
| H | 4.902810  | -1.702454 | -1.635231 |
| H | 4.062227  | -1.859996 | -0.085118 |
| H | 8.622191  | -2.705102 | -0.858070 |
| H | 8.937044  | -1.811773 | 0.644372  |
| H | 9.384426  | -1.116507 | -0.927115 |
| H | 2.374656  | -0.857629 | -0.537940 |
| H | -0.989344 | 3.405358  | 0.278662  |
| H | -1.748365 | -1.294672 | -0.280313 |
| H | -4.084366 | -2.110791 | -0.265802 |
| H | -5.463604 | 1.920860  | 0.299928  |
| H | -3.150942 | 2.717851  | 0.283426  |

### **3b**

|   |          |           |           |
|---|----------|-----------|-----------|
| C | 4.991037 | -1.597393 | 0.058782  |
| C | 5.018879 | -1.158218 | 1.554001  |
| C | 5.571930 | 0.291954  | 1.501210  |
| C | 5.801135 | 0.543627  | -0.018144 |
| N | 6.025120 | -0.790715 | -0.612642 |
| C | 4.552908 | 1.135300  | -0.696305 |
| C | 3.633701 | -1.269475 | -0.599762 |
| C | 3.359217 | 0.219583  | -0.546300 |

|   |           |           |           |
|---|-----------|-----------|-----------|
| C | 7.381037  | -1.300949 | -0.424712 |
| N | 2.213139  | 0.774373  | -0.390638 |
| N | 1.093145  | 0.009590  | -0.303496 |
| C | -0.130029 | 0.614099  | -0.164904 |
| S | -0.272727 | 2.349491  | 0.067185  |
| C | -2.002642 | 2.117432  | 0.147418  |
| C | -2.330283 | 0.800109  | -0.006882 |
| N | -1.244736 | -0.046875 | -0.182240 |
| C | -3.685094 | 0.220229  | 0.002408  |
| C | -3.856836 | -1.172228 | -0.079335 |
| C | -5.118190 | -1.742862 | -0.067724 |
| C | -6.258721 | -0.937564 | 0.025422  |
| C | -6.109987 | 0.450300  | 0.104273  |
| C | -4.835327 | 1.010678  | 0.090837  |
| O | -7.455344 | -1.593180 | 0.029581  |
| C | -8.646369 | -0.826472 | 0.122247  |
| H | 5.203000  | -2.660733 | -0.070673 |
| H | 5.676872  | -1.810113 | 2.132255  |
| H | 4.029911  | -1.212892 | 2.014090  |
| H | 4.880488  | 1.018850  | 1.931674  |
| H | 6.510883  | 0.374319  | 2.052583  |
| H | 6.661196  | 1.187580  | -0.213068 |
| H | 4.779668  | 1.253290  | -1.762569 |
| H | 4.299732  | 2.119225  | -0.295828 |
| H | 3.665803  | -1.601779 | -1.644265 |
| H | 2.846123  | -1.836181 | -0.092830 |
| H | 7.459571  | -2.291195 | -0.880057 |

|   |           |           |           |
|---|-----------|-----------|-----------|
| H | 7.700898  | -1.384025 | 0.627617  |
| H | 8.085502  | -0.643682 | -0.939888 |
| H | 1.078963  | -0.975080 | -0.540721 |
| H | -2.647040 | 2.966255  | 0.304937  |
| H | -2.977063 | -1.797790 | -0.152446 |
| H | -5.249403 | -2.816556 | -0.129838 |
| H | -6.971372 | 1.101018  | 0.172760  |
| H | -4.749696 | 2.089864  | 0.145839  |
| H | -8.684484 | -0.252015 | 1.054873  |
| H | -8.753402 | -0.143464 | -0.728216 |
| H | -9.464641 | -1.544817 | 0.110083  |

### **3c**

|   |           |           |           |
|---|-----------|-----------|-----------|
| C | 4.799742  | -1.615901 | 0.069242  |
| C | 4.826016  | -1.171228 | 1.562742  |
| C | 5.383521  | 0.277154  | 1.505360  |
| C | 5.615770  | 0.522235  | -0.014509 |
| N | 5.836256  | -0.814571 | -0.603943 |
| C | 4.370584  | 1.115260  | -0.697292 |
| C | 3.444524  | -1.286896 | -0.593727 |
| C | 3.174302  | 0.202981  | -0.548391 |
| C | 7.191050  | -1.328245 | -0.414776 |
| N | 2.029434  | 0.762396  | -0.401886 |
| N | 0.905437  | -0.000925 | -0.318147 |
| C | -0.310214 | 0.609762  | -0.178520 |
| S | -0.432981 | 2.352064  | 0.037354  |
| C | -2.160906 | 2.142373  | 0.128516  |

|   |           |           |           |
|---|-----------|-----------|-----------|
| C | -2.503539 | 0.826384  | -0.008650 |
| N | -1.433752 | -0.037837 | -0.182523 |
| C | -3.866043 | 0.269947  | 0.014301  |
| C | -4.999684 | 1.084030  | 0.172649  |
| C | -6.273235 | 0.540951  | 0.192676  |
| C | -6.450648 | -0.844542 | 0.053022  |
| C | -5.326671 | -1.666823 | -0.106483 |
| C | -4.055353 | -1.113862 | -0.125118 |
| C | -7.763394 | -1.408707 | 0.073328  |
| N | -8.825444 | -1.864466 | 0.090013  |
| H | 5.008265  | -2.680277 | -0.056116 |
| H | 5.481200  | -1.822797 | 2.144303  |
| H | 3.836386  | -1.221784 | 2.022042  |
| H | 4.694368  | 1.008060  | 1.932799  |
| H | 6.321993  | 0.358466  | 2.057454  |
| H | 6.477474  | 1.163342  | -0.210744 |
| H | 4.599014  | 1.228181  | -1.763613 |
| H | 4.118955  | 2.101329  | -0.301263 |
| H | 3.478763  | -1.621959 | -1.637161 |
| H | 2.654193  | -1.850132 | -0.087182 |
| H | 7.266482  | -2.319959 | -0.867197 |
| H | 7.510491  | -1.408832 | 0.637686  |
| H | 7.897038  | -0.674582 | -0.932226 |
| H | 0.891649  | -0.990507 | -0.533930 |
| H | -2.795709 | 3.000782  | 0.272969  |
| H | -4.889321 | 2.156003  | 0.281117  |
| H | -7.138425 | 1.180638  | 0.315470  |



|   |           |           |           |
|---|-----------|-----------|-----------|
| H | -5.458512 | -2.736405 | -0.214899 |
| H | -3.185053 | -1.744012 | -0.247981 |

### 3d

|   |           |           |           |
|---|-----------|-----------|-----------|
| C | 5.181681  | -1.660712 | 0.082789  |
| C | 5.212806  | -1.208421 | 1.573915  |
| C | 5.803372  | 0.226583  | 1.510578  |
| C | 6.046035  | 0.457927  | -0.009800 |
| N | 6.238265  | -0.886739 | -0.591133 |
| C | 4.816769  | 1.075062  | -0.700043 |
| C | 3.836494  | -1.304855 | -0.586884 |
| C | 3.599773  | 0.190881  | -0.550002 |
| C | 7.580507  | -1.429804 | -0.394439 |
| N | 2.467573  | 0.776969  | -0.409582 |
| N | 1.326094  | 0.039571  | -0.325312 |
| C | 0.125288  | 0.678515  | -0.189629 |
| S | 0.044070  | 2.425122  | 0.016949  |
| C | -1.687481 | 2.257554  | 0.108286  |
| C | -2.061821 | 0.949061  | -0.021827 |
| N | -1.013542 | 0.058222  | -0.190716 |
| C | -3.437238 | 0.427609  | 0.003204  |
| C | -4.549051 | 1.272411  | 0.166080  |
| C | -5.836947 | 0.763202  | 0.187617  |
| C | -6.021361 | -0.609773 | 0.044317  |
| C | -4.944571 | -1.474443 | -0.119057 |
| C | -3.659685 | -0.952111 | -0.138769 |
| N | -7.388831 | -1.156682 | 0.066604  |

|   |           |           |           |
|---|-----------|-----------|-----------|
| O | -7.520398 | -2.368073 | -0.061569 |
| O | -8.315481 | -0.367927 | 0.212174  |
| H | 5.366392  | -2.730201 | -0.036044 |
| H | 5.850940  | -1.871462 | 2.161408  |
| H | 4.220718  | -1.233953 | 2.029989  |
| H | 5.129792  | 0.975372  | 1.931857  |
| H | 6.741702  | 0.289497  | 2.065280  |
| H | 6.922537  | 1.078423  | -0.206663 |
| H | 5.050924  | 1.176545  | -1.766258 |
| H | 4.586249  | 2.068831  | -0.310488 |
| H | 3.867172  | -1.645550 | -1.628577 |
| H | 3.031974  | -1.847960 | -0.080719 |
| H | 7.635029  | -2.425459 | -0.841139 |
| H | 7.894416  | -1.511676 | 0.659558  |
| H | 8.302789  | -0.795132 | -0.913016 |
| H | 1.290590  | -0.951191 | -0.533108 |
| H | -2.301867 | 3.131656  | 0.246817  |
| H | -4.410387 | 2.340530  | 0.277398  |
| H | -6.698664 | 1.403640  | 0.312313  |
| H | -5.127297 | -2.534394 | -0.227326 |
| H | -2.805446 | -1.602968 | -0.264356 |

### **3e**

|   |          |           |           |
|---|----------|-----------|-----------|
| C | 4.616223 | -1.557718 | 0.074465  |
| C | 4.645583 | -1.094018 | 1.562245  |
| C | 5.176511 | 0.363162  | 1.483005  |
| C | 5.394034 | 0.593581  | -0.041410 |

|   |           |           |           |
|---|-----------|-----------|-----------|
| N | 5.634709  | -0.746813 | -0.615587 |
| C | 4.133619  | 1.155694  | -0.722119 |
| C | 3.250684  | -1.260612 | -0.581612 |
| C | 2.954401  | 0.224967  | -0.550990 |
| C | 6.998951  | -1.233890 | -0.426875 |
| N | 1.800818  | 0.764999  | -0.398650 |
| N | 0.693015  | -0.014267 | -0.293498 |
| C | -0.539674 | 0.573596  | -0.159751 |
| S | -0.709283 | 2.308811  | 0.051229  |
| C | -2.435713 | 2.049619  | 0.139729  |
| C | -2.743057 | 0.725045  | 0.003663  |
| N | -1.643048 | -0.105719 | -0.165448 |
| C | -4.086897 | 0.123729  | 0.023844  |
| C | -5.252595 | 0.896311  | 0.133467  |
| C | -6.510030 | 0.313501  | 0.153017  |
| C | -6.657744 | -1.079746 | 0.059724  |
| C | -5.497142 | -1.858517 | -0.050715 |
| C | -4.242254 | -1.266620 | -0.068817 |
| N | -7.918479 | -1.672558 | 0.137871  |
| H | 4.843481  | -2.619767 | -0.038945 |
| H | 5.316390  | -1.726608 | 2.147225  |
| H | 3.660009  | -1.155890 | 2.028626  |
| H | 4.476309  | 1.086464  | 1.905255  |
| H | 6.116922  | 0.468552  | 2.027980  |
| H | 6.243539  | 1.246809  | -0.251319 |
| H | 4.353282  | 1.260245  | -1.791299 |
| H | 3.867894  | 2.141997  | -0.335848 |

|   |           |           |           |
|---|-----------|-----------|-----------|
| H | 3.281821  | -1.610096 | -1.620566 |
| H | 2.474272  | -1.830052 | -0.060665 |
| H | 7.089883  | -2.229990 | -0.866948 |
| H | 7.325555  | -1.295596 | 0.624894  |
| H | 7.690959  | -0.574541 | -0.956123 |
| H | 0.692207  | -1.002327 | -0.516569 |
| H | -3.093157 | 2.890371  | 0.285919  |
| H | -5.183556 | 1.976183  | 0.200514  |
| H | -7.392386 | 0.939553  | 0.243264  |
| H | -5.583352 | -2.938724 | -0.119409 |
| H | -3.354999 | -1.879894 | -0.157602 |
| H | -7.985494 | -2.593836 | -0.269263 |
| H | -8.689557 | -1.081819 | -0.136820 |

### **3f**

|   |          |           |           |
|---|----------|-----------|-----------|
| C | 6.011390 | -1.893713 | 0.206241  |
| C | 6.184845 | -1.261651 | 1.620291  |
| C | 6.916139 | 0.078715  | 1.336721  |
| C | 7.085029 | 0.085828  | -0.211005 |
| N | 7.098579 | -1.335178 | -0.616204 |
| C | 5.886006 | 0.743706  | -0.916318 |
| C | 4.670975 | -1.477543 | -0.437191 |
| C | 4.594892 | 0.027722  | -0.590515 |
| C | 8.386295 | -1.995112 | -0.413641 |
| N | 3.540419 | 0.749232  | -0.476983 |
| N | 2.336698 | 0.161730  | -0.240816 |
| C | 1.214886 | 0.940551  | -0.141196 |

|   |           |           |           |
|---|-----------|-----------|-----------|
| S | 1.316989  | 2.695580  | -0.164851 |
| C | -0.418966 | 2.721666  | 0.019191  |
| C | -0.925488 | 1.454151  | 0.076046  |
| N | 0.022798  | 0.446351  | -0.014344 |
| C | -2.342130 | 1.079913  | 0.229348  |
| C | -3.372602 | 2.030050  | 0.194076  |
| C | -4.699889 | 1.652632  | 0.335085  |
| C | -5.038305 | 0.309603  | 0.539538  |
| C | -4.022029 | -0.649068 | 0.590227  |
| C | -2.698284 | -0.262529 | 0.421383  |
| N | -6.401828 | -0.041495 | 0.730998  |
| S | -7.184060 | -1.302350 | -0.074804 |
| O | -8.589133 | -1.135441 | 0.270402  |
| O | -6.465576 | -2.537526 | 0.200282  |
| C | -6.977094 | -0.949693 | -1.834326 |
| H | 6.075722  | -2.983571 | 0.222479  |
| H | 6.786789  | -1.911577 | 2.258556  |
| H | 5.226625  | -1.118029 | 2.124251  |
| H | 6.351460  | 0.945269  | 1.686103  |
| H | 7.889023  | 0.107320  | 1.831647  |
| H | 8.007795  | 0.573734  | -0.531440 |
| H | 6.062666  | 0.682853  | -1.996704 |
| H | 5.785688  | 1.798336  | -0.651254 |
| H | 4.597772  | -1.951849 | -1.423109 |
| H | 3.848186  | -1.856040 | 0.177801  |
| H | 8.308374  | -3.039775 | -0.724389 |
| H | 8.755811  | -1.975611 | 0.625320  |

|   |           |           |           |
|---|-----------|-----------|-----------|
| H | 9.137037  | -1.517115 | -1.047266 |
| H | 2.184428  | -0.836569 | -0.320008 |
| H | -0.934600 | 3.665485  | 0.083068  |
| H | -3.144378 | 3.077391  | 0.035453  |
| H | -5.481936 | 2.403818  | 0.286076  |
| H | -4.274629 | -1.685516 | 0.768802  |
| H | -1.911612 | -1.004471 | 0.455138  |
| H | -7.040861 | 0.728297  | 0.884439  |
| H | -7.420084 | -1.786336 | -2.373324 |
| H | -5.912874 | -0.877410 | -2.054249 |
| H | -7.496279 | -0.022411 | -2.070657 |

### **3g**

|   |           |           |           |
|---|-----------|-----------|-----------|
| C | -5.341797 | 1.728893  | 0.139691  |
| C | -5.400021 | 1.212283  | 1.609069  |
| C | -6.035485 | -0.198664 | 1.477898  |
| C | -6.272079 | -0.355045 | -0.052968 |
| N | -6.417075 | 1.019801  | -0.575235 |
| C | -5.056912 | -0.979943 | -0.760682 |
| C | -4.002857 | 1.359967  | -0.535124 |
| C | -3.813684 | -0.142981 | -0.561499 |
| C | -7.742698 | 1.596022  | -0.362379 |
| N | -2.702102 | -0.770364 | -0.436134 |
| N | -1.539205 | -0.076357 | -0.308623 |
| C | -0.356604 | -0.758489 | -0.198011 |
| S | -0.323826 | -2.512455 | -0.059243 |
| C | 1.412449  | -2.402581 | 0.041570  |

|   |           |           |           |
|---|-----------|-----------|-----------|
| C | 1.821175  | -1.100599 | -0.037018 |
| N | 0.797509  | -0.170120 | -0.173527 |
| C | 3.197945  | -0.599977 | 0.007899  |
| C | 4.313219  | -1.550640 | 0.150901  |
| O | 5.592303  | -1.004034 | 0.186098  |
| C | 5.846865  | 0.331126  | 0.096994  |
| C | 4.795820  | 1.251324  | -0.039481 |
| C | 3.461643  | 0.733743  | -0.080624 |
| C | 7.176429  | 0.743573  | 0.146187  |
| C | 7.463073  | 2.099115  | 0.057692  |
| C | 6.433030  | 3.039876  | -0.079064 |
| C | 5.114972  | 2.619586  | -0.127001 |
| O | 4.235561  | -2.748140 | 0.240530  |
| H | -5.492142 | 2.808010  | 0.067413  |
| H | -6.021483 | 1.868996  | 2.221204  |
| H | -4.411301 | 1.185071  | 2.072243  |
| H | -5.389435 | -0.986412 | 1.870110  |
| H | -6.980099 | -0.255752 | 2.022613  |
| H | -7.166356 | -0.937623 | -0.283330 |
| H | -5.285258 | -1.027456 | -1.831994 |
| H | -4.861537 | -1.996680 | -0.413493 |
| H | -4.013279 | 1.747819  | -1.560698 |
| H | -3.186092 | 1.853860  | 0.001089  |
| H | -8.480962 | 1.008560  | -0.913194 |
| H | -7.762526 | 2.611995  | -0.764172 |
| H | -8.062010 | 1.640779  | 0.692349  |
| H | -1.469766 | 0.918914  | -0.483373 |

|   |          |           |           |
|---|----------|-----------|-----------|
| H | 2.024084 | -3.280864 | 0.146135  |
| H | 2.627006 | 1.416746  | -0.185234 |
| H | 7.954281 | -0.002021 | 0.252207  |
| H | 8.494665 | 2.429262  | 0.095088  |
| H | 6.669979 | 4.094856  | -0.147103 |
| H | 4.309761 | 3.338357  | -0.232647 |

### **3h**

|   |           |           |           |
|---|-----------|-----------|-----------|
| C | 5.421725  | -1.843080 | 0.085299  |
| C | 5.498108  | -1.381830 | 1.572145  |
| C | 6.197031  | 0.002709  | 1.492318  |
| C | 6.448095  | 0.201151  | -0.031501 |
| N | 6.532073  | -1.159880 | -0.601158 |
| C | 5.266162  | 0.905854  | -0.720308 |
| C | 4.104068  | -1.388899 | -0.578973 |
| C | 3.984778  | 0.121185  | -0.552655 |
| C | 7.828584  | -1.803598 | -0.403752 |
| N | 2.902588  | 0.794272  | -0.406610 |
| N | 1.709651  | 0.150728  | -0.305164 |
| C | 0.556922  | 0.880157  | -0.172493 |
| S | 0.596970  | 2.625724  | 0.029264  |
| C | -1.146559 | 2.576327  | 0.120861  |
| C | -1.610039 | 1.297233  | -0.006637 |
| N | -0.620573 | 0.338895  | -0.172610 |
| C | -3.017676 | 0.863889  | 0.018796  |
| C | -4.076697 | 1.773645  | 0.155038  |
| C | -5.391636 | 1.340337  | 0.178306  |



|   |           |           |           |
|---|-----------|-----------|-----------|
| C | -5.701517 | -0.023304 | 0.065148  |
| C | -4.656695 | -0.944231 | -0.073073 |
| C | -3.341470 | -0.494256 | -0.094547 |
| N | -7.064809 | -0.384466 | 0.097666  |
| C | -7.634754 | -1.635287 | 0.007792  |
| O | -7.004604 | -2.667481 | -0.119835 |
| C | -9.154851 | -1.639054 | 0.080839  |
| H | 5.522350  | -2.924784 | -0.024655 |
| H | 6.087355  | -2.087178 | 2.161675  |
| H | 4.510055  | -1.326577 | 2.034124  |
| H | 5.584538  | 0.804682  | 1.908846  |
| H | 7.140354  | -0.001356 | 2.042304  |
| H | 7.369551  | 0.749274  | -0.238454 |
| H | 5.501246  | 0.979658  | -1.788727 |
| H | 5.116859  | 1.918006  | -0.338413 |
| H | 4.099848  | -1.741156 | -1.617367 |
| H | 3.263357  | -1.862608 | -0.062099 |
| H | 7.803487  | -2.805248 | -0.839764 |
| H | 8.140328  | -1.898752 | 0.649949  |
| H | 8.595936  | -1.232591 | -0.931758 |
| H | 1.593672  | -0.832862 | -0.517730 |
| H | -1.698551 | 3.491089  | 0.259107  |
| H | -3.878452 | 2.835393  | 0.242837  |
| H | -6.192072 | 2.066975  | 0.284545  |
| H | -4.884208 | -1.994891 | -0.161486 |
| H | -2.535159 | -1.207770 | -0.201696 |
| H | -7.704415 | 0.387650  | 0.201337  |

H -9.457977 -2.270599 0.918236  
 H -9.542593 -2.097727 -0.830953  
 H -9.604177 -0.650896 0.200126

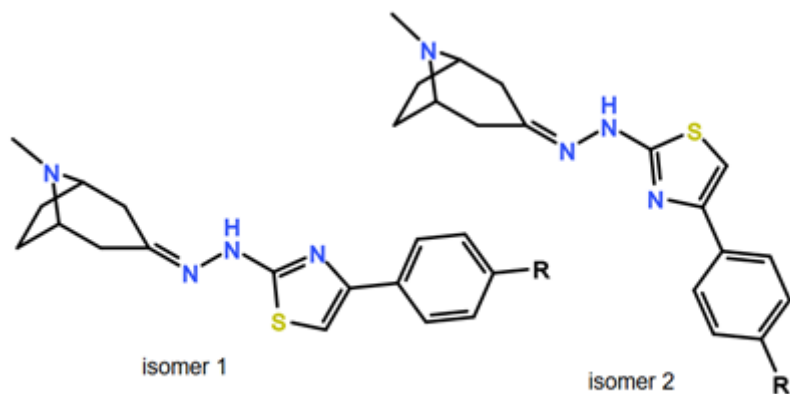

**Scheme S1.** Structure of isomers 1 and 2 of investigated compounds.

**Table S6.** Fractional populations of isomers 1 and 2 of investigated compounds [%].

| Molecule  | isomer 1 [%] | isomer 2 [%] |
|-----------|--------------|--------------|
| <b>3a</b> | 100.00       | 0.00         |
| <b>3b</b> | 100.00       | 0.00         |
| <b>3c</b> | 100.00       | 0.00         |
| <b>3d</b> | 100.00       | 0.00         |
| <b>3e</b> | 100.00       | 0.00         |
| <b>3f</b> | 99.99        | 0.01         |
| <b>3g</b> | 99.99        | 0.01         |
| <b>3h</b> | 99.99        | 0.01         |
